# Supplementary material for: Discovery and 3D imaging of a novel ΔNp63-expressing basal cell type in human pancreatic ducts with implications in disease
Source: HighWire-hosted journal article supplement (doi:10.1136/gutjnl-2020-322874), 2021-07-30
Supplement: gutjnl-2020-322874supp007_data_supplement.xlsx [file gutjnl-2020-322874supp007_data_supplement.xlsx]

## Sheet: Blad1
Gene ID	Gene Name	KDvscontrol : logFC	KDvscontrol : PValue	KDvscontrol : FDR
ENSG00000162344	FGF19	-5.25116	7.03845e-07	1.77601e-05
ENSG00000187912	CLEC17A	-5.19549	2.96317e-15	3.8992e-13
ENSG00000179817	MRGPRX4	-4.16488	5.22544e-06	0.00010436
ENSG00000188373	C10orf99	-3.92453	5.11712e-10	2.69846e-08
ENSG00000187134	AKR1C1	-3.89871	1.19261e-10	7.08522e-09
ENSG00000156475	PPP2R2B	-3.8077	1.82721e-09	8.4351e-08
ENSG00000224689	ZNF812P	-3.79521	8.08407e-13	7.43945e-11
ENSG00000073282	TP63	-3.68956	2.99979e-93	4.2237e-89
ENSG00000169297	NR0B1	-3.56734	4.8797e-11	3.081e-09
ENSG00000109255	NMU	-3.56674	1.82192e-16	2.6446e-14
ENSG00000279307	RP11-130L8.3	-3.47348	1.35718e-05	0.000236498
ENSG00000110076	NRXN2	-3.44869	0.000178218	0.00212956
ENSG00000050767	COL23A1	-3.44618	4.33354e-09	1.84898e-07
ENSG00000139219	COL2A1	-3.41375	8.83957e-08	2.85461e-06
ENSG00000145934	TENM2	-3.3852	8.04218e-27	3.53856e-24
ENSG00000224260	RP1-272L16.1	-3.37391	1.18399e-05	0.000209038
ENSG00000132718	SYT11	-3.34061	9.49018e-08	3.02997e-06
ENSG00000151632	AKR1C2	-3.33114	1.08227e-12	9.58384e-11
ENSG00000016602	CLCA4	-3.29186	1.72856e-06	3.91918e-05
ENSG00000167080	B4GALNT2	-3.23835	3.86507e-06	8.01476e-05
ENSG00000133107	TRPC4	-3.22218	1.09344e-05	0.000195873
ENSG00000080493	SLC4A4	-3.18903	3.53308e-07	9.60575e-06
ENSG00000177627	C12orf54	-3.16308	6.61021e-07	1.68e-05
ENSG00000172548	NIPAL4	-3.15721	1.16731e-41	1.8262e-38
ENSG00000180638	SLC47A2	-3.1427	0.000182503	0.00216847
ENSG00000099260	PALMD	-3.12494	2.66986e-11	1.77319e-09
ENSG00000230943	RP11-367G18.1	-2.96009	1.13219e-07	3.5504e-06
ENSG00000185614	FAM212A	-2.95772	4.95061e-12	3.82993e-10
ENSG00000137975	CLCA2	-2.94805	1.93217e-09	8.86155e-08
ENSG00000100385	IL2RB	-2.94713	3.8643e-07	1.04433e-05
ENSG00000156509	FBXO43	-2.90977	4.83419e-06	9.74821e-05
ENSG00000095587	TLL2	-2.87936	3.28402e-12	2.65741e-10
ENSG00000164604	GPR85	-2.87035	4.57942e-11	2.90913e-09
ENSG00000177098	SCN4B	-2.82141	2.62268e-05	0.000416317
ENSG00000157168	NRG1	-2.7803	9.28912e-28	4.8441e-25
ENSG00000271134	RP11-416L21.2	-2.77109	9.80719e-06	0.000178854
ENSG00000087245	MMP2	-2.74761	9.74307e-08	3.09667e-06
ENSG00000066468	FGFR2	-2.66315	4.13006e-15	5.28647e-13
ENSG00000165799	RNASE7	-2.65228	8.80088e-26	3.26096e-23
ENSG00000061337	LZTS1	-2.65001	3.86879e-05	0.000585727
ENSG00000118193	KIF14	-2.60698	6.03644e-09	2.51459e-07
ENSG00000121552	CSTA	-2.54813	5.74774e-13	5.46812e-11
ENSG00000260088	RP11-92G12.3	-2.53772	1.5362e-09	7.15821e-08
ENSG00000206535	LNP1	-2.52749	1.3808e-05	0.000240021
ENSG00000109101	FOXN1	-2.52586	1.28837e-06	3.01835e-05
ENSG00000128805	ARHGAP22	-2.51422	9.05965e-20	2.02476e-17
ENSG00000169435	RASSF6	-2.50725	2.95657e-24	9.25078e-22
ENSG00000144406	UNC80	-2.50698	0.00102772	0.00927583
ENSG00000134259	NGF	-2.49367	0.000195964	0.00230123
ENSG00000151914	DST	-2.49056	4.29529e-35	4.65213e-32
ENSG00000176153	GPX2	-2.47966	8.25604e-18	1.50968e-15
ENSG00000206199	ANKUB1	-2.47811	6.41898e-07	1.63731e-05
ENSG00000144834	TAGLN3	-2.4716	1.83487e-05	0.000304298
ENSG00000163531	NFASC	-2.46451	6.53282e-13	6.16775e-11
ENSG00000171388	APLN	-2.45085	1.89622e-08	7.00757e-07
ENSG00000179826	MRGPRX3	-2.44167	8.75965e-12	6.29265e-10
ENSG00000122877	EGR2	-2.39226	4.77876e-07	1.26238e-05
ENSG00000171462	DLK2	-2.38803	2.22052e-09	1.00208e-07
ENSG00000019549	SNAI2	-2.3636	3.33363e-19	7.22116e-17
ENSG00000087258	GNAO1	-2.33814	1.55282e-05	0.000265014
ENSG00000204624	DISP3	-2.32885	1.81025e-06	4.07161e-05
ENSG00000140451	PIF1	-2.32708	4.82606e-05	0.000704155
ENSG00000150667	FSIP1	-2.32689	4.97096e-09	2.10184e-07
ENSG00000255398	HCAR3	-2.32477	1.73666e-06	3.93123e-05
ENSG00000123080	CDKN2C	-2.31821	6.59981e-13	6.16775e-11
ENSG00000186197	EDARADD	-2.3177	4.81579e-13	4.61267e-11
ENSG00000278621	CTD-2033D15.3	-2.31683	0.000216078	0.00248968
ENSG00000256812	CAPNS2	-2.30012	1.86743e-06	4.1802e-05
ENSG00000257219	RP11-54A9.1	-2.29013	2.10113e-08	7.74447e-07
ENSG00000128045	RASL11B	-2.28341	5.65551e-06	0.000111839
ENSG00000183230	CTNNA3	-2.27818	5.71525e-08	1.94374e-06
ENSG00000106278	PTPRZ1	-2.27533	1.56901e-16	2.30121e-14
ENSG00000139269	INHBE	-2.27401	0.000435474	0.00452841
ENSG00000103647	CORO2B	-2.25449	1.76325e-13	1.839e-11
ENSG00000115461	IGFBP5	-2.23881	1.23441e-09	5.95223e-08
ENSG00000064300	NGFR	-2.23075	7.99538e-09	3.18009e-07
ENSG00000115457	IGFBP2	-2.22834	2.68143e-05	0.000423258
ENSG00000156298	TSPAN7	-2.21371	1.28871e-07	3.91903e-06
ENSG00000198821	CD247	-2.21242	8.0179e-05	0.00108342
ENSG00000115008	IL1A	-2.20868	6.32051e-25	2.28186e-22
ENSG00000250685	RP11-486L19.2	-2.1937	6.60158e-12	4.918e-10
ENSG00000131183	SLC34A1	-2.1868	8.17939e-05	0.00110101
ENSG00000204899	MZT1	-2.18645	1.44793e-16	2.16881e-14
ENSG00000004777	ARHGAP33	-2.18077	8.15827e-09	3.23573e-07
ENSG00000112964	GHR	-2.17535	9.93478e-06	0.000180493
ENSG00000035499	DEPDC1B	-2.16831	2.74815e-11	1.80813e-09
ENSG00000163219	ARHGAP25	-2.16375	3.5539e-10	1.9172e-08
ENSG00000129993	CBFA2T3	-2.1568	1.58027e-05	0.000269047
ENSG00000241255	RP1-89D4.1	-2.12531	0.000513543	0.00520193
ENSG00000100628	ASB2	-2.10732	0.000564036	0.00560059
ENSG00000166130	IKBIP	-2.10508	5.50944e-18	1.04828e-15
ENSG00000074410	CA12	-2.10458	1.05089e-16	1.626e-14
ENSG00000277586	NEFL	-2.099	1.09354e-09	5.36484e-08
ENSG00000024526	DEPDC1	-2.09389	2.03503e-11	1.38421e-09
ENSG00000149557	FEZ1	-2.06814	2.61084e-26	1.0812e-23
ENSG00000233901	LINC01503	-2.0606	2.86543e-12	2.34565e-10
ENSG00000181104	F2R	-2.05829	3.42032e-15	4.45908e-13
ENSG00000167676	PLIN4	-2.051	6.35854e-08	2.12271e-06
ENSG00000119714	GPR68	-2.01544	1.23102e-07	3.75981e-06
ENSG00000149150	SLC43A1	-2.00758	5.76468e-05	0.000818579
ENSG00000140961	OSGIN1	-2.00049	8.09688e-05	0.00109199
ENSG00000156265	MAP3K7CL	-1.98939	6.40957e-14	7.21974e-12
ENSG00000188001	TPRG1	-1.9847	8.09689e-05	0.00109199
ENSG00000182103	FAM181B	-1.98428	4.48076e-11	2.86769e-09
ENSG00000204767	FAM196B	-1.98358	0.000966698	0.0088212
ENSG00000198768	APCDD1L	-1.98141	5.74497e-12	4.37239e-10
ENSG00000144476	ACKR3	-1.96379	2.08058e-07	6.0277e-06
ENSG00000196754	S100A2	-1.95426	8.22475e-21	1.99663e-18
ENSG00000158023	WDR66	-1.94356	1.93702e-26	8.26464e-24
ENSG00000154734	ADAMTS1	-1.94152	1.91475e-20	4.49328e-18
ENSG00000142619	PADI3	-1.9329	0.000135029	0.00168697
ENSG00000224843	LINC00240	-1.92649	0.000860107	0.00800417
ENSG00000148680	HTR7	-1.9204	1.59573e-09	7.39075e-08
ENSG00000145777	TSLP	-1.9195	0.000877631	0.00813898
ENSG00000125538	IL1B	-1.89439	1.34684e-30	9.98079e-28
ENSG00000175121	WFDC5	-1.89338	1.66379e-05	0.000279883
ENSG00000174500	GCSAM	-1.88913	1.97469e-09	9.02714e-08
ENSG00000214999	AC129492.6	-1.88605	0.000152211	0.00186492
ENSG00000276600	RAB7B	-1.88483	3.73159e-13	3.62351e-11
ENSG00000144959	NCEH1	-1.87708	4.24718e-31	3.32223e-28
ENSG00000087494	PTHLH	-1.87656	3.10583e-09	1.35808e-07
ENSG00000179593	ALOX15B	-1.87496	0.000715533	0.00687224
ENSG00000225177	RP11-390P2.4	-1.86473	0.000707481	0.0068275
ENSG00000133101	CCNA1	-1.85736	3.53393e-07	9.60575e-06
ENSG00000139209	SLC38A4	-1.85169	0.000332058	0.00360198
ENSG00000126787	DLGAP5	-1.84328	6.26495e-06	0.000122345
ENSG00000138795	LEF1	-1.84079	5.56296e-07	1.43983e-05
ENSG00000040731	CDH10	-1.83674	8.72563e-06	0.00016208
ENSG00000261189	RP3-512B11.3	-1.82472	0.000773298	0.0073074
ENSG00000137642	SORL1	-1.81284	7.91353e-20	1.79714e-17
ENSG00000137266	SLC22A23	-1.81217	2.25494e-14	2.62393e-12
ENSG00000105887	MTPN	-1.79953	1.0266e-24	3.61364e-22
ENSG00000221869	CEBPD	-1.79183	1.53792e-16	2.27936e-14
ENSG00000010270	STARD3NL	-1.78379	1.95629e-21	4.91867e-19
ENSG00000152779	SLC16A12	-1.77706	5.52016e-05	0.000790713
ENSG00000165821	SALL2	-1.77462	5.3299e-08	1.83484e-06
ENSG00000187997	C17orf99	-1.77452	0.000730637	0.00696976
ENSG00000224861	YBX1P1	-1.77132	0.000897241	0.0082786
ENSG00000163040	CCDC74A	-1.77043	4.33671e-06	8.88805e-05
ENSG00000178695	KCTD12	-1.76249	1.42552e-13	1.50912e-11
ENSG00000166349	RAG1	-1.75775	1.42227e-06	3.2775e-05
ENSG00000138135	CH25H	-1.75685	3.15452e-05	0.000490781
ENSG00000197614	MFAP5	-1.75683	5.42379e-06	0.000108016
ENSG00000103888	CEMIP	-1.75064	3.07151e-07	8.51316e-06
ENSG00000229647	MYOSLID	-1.749	6.4963e-09	2.69817e-07
ENSG00000163535	SGO2	-1.74843	2.90908e-07	8.09482e-06
ENSG00000125740	FOSB	-1.74709	1.27245e-09	6.07327e-08
ENSG00000157554	ERG	-1.7441	0.00107391	0.00962671
ENSG00000134762	DSC3	-1.73009	3.5419e-13	3.46721e-11
ENSG00000131747	TOP2A	-1.72698	2.31382e-06	5.04314e-05
ENSG00000180739	S1PR5	-1.72538	3.5426e-10	1.9172e-08
ENSG00000126773	PCNX4	-1.72003	1.71194e-23	5.0217e-21
ENSG00000066279	ASPM	-1.71894	1.17391e-05	0.000207908
ENSG00000139117	CPNE8	-1.71783	2.25852e-09	1.01274e-07
ENSG00000110693	SOX6	-1.71767	2.09081e-06	4.64331e-05
ENSG00000230074	RP11-195F19.9	-1.71703	8.54666e-05	0.00114105
ENSG00000169607	CKAP2L	-1.71539	4.89646e-05	0.000713686
ENSG00000112742	TTK	-1.71462	2.83305e-10	1.56429e-08
ENSG00000117724	CENPF	-1.71305	5.63135e-05	0.000804968
ENSG00000155918	RAET1L	-1.70585	0.000191183	0.0022526
ENSG00000143228	NUF2	-1.69775	1.18523e-08	4.58461e-07
ENSG00000109321	AREG	-1.6962	1.62904e-23	4.88018e-21
ENSG00000149646	CNBD2	-1.67181	0.000881389	0.00816444
ENSG00000118777	ABCG2	-1.66686	1.8784e-06	4.19808e-05
ENSG00000003096	KLHL13	-1.66445	2.05481e-09	9.33281e-08
ENSG00000081181	ARG2	-1.65905	2.71657e-24	8.69302e-22
ENSG00000145335	SNCA	-1.65423	2.4505e-08	8.86969e-07
ENSG00000182118	FAM89A	-1.65217	1.21635e-07	3.7312e-06
ENSG00000162493	PDPN	-1.65172	6.31026e-10	3.25452e-08
ENSG00000170312	CDK1	-1.64604	1.20881e-07	3.72397e-06
ENSG00000130208	APOC1	-1.64402	2.94228e-06	6.22968e-05
ENSG00000154511	FAM69A	-1.64166	2.54047e-13	2.57337e-11
ENSG00000231007	CDC20P1	-1.64115	1.88175e-06	4.19891e-05
ENSG00000121743	GJA3	-1.63752	1.36188e-07	4.10607e-06
ENSG00000115844	DLX2	-1.63684	7.79776e-05	0.0010557
ENSG00000213420	GPC2	-1.61999	0.000144991	0.00178919
ENSG00000115339	GALNT3	-1.6176	4.54518e-27	2.1332e-24
ENSG00000151012	SLC7A11	-1.61752	8.24066e-18	1.50968e-15
ENSG00000148600	CDHR1	-1.61618	9.94506e-10	4.89603e-08
ENSG00000213906	LTB4R2	-1.60319	2.70313e-09	1.19686e-07
ENSG00000131094	C1QL1	-1.59734	7.97167e-05	0.0010782
ENSG00000230937	MIR205HG	-1.59218	9.26474e-22	2.41569e-19
ENSG00000185909	KLHDC8B	-1.58835	6.04267e-05	0.000846575
ENSG00000196937	FAM3C	-1.58765	6.25994e-12	4.68829e-10
ENSG00000183770	FOXL2	-1.58755	9.2626e-07	2.26813e-05
ENSG00000248905	FMN1	-1.58678	8.19956e-06	0.000153728
ENSG00000111328	CDK2AP1	-1.58092	3.0546e-16	4.34432e-14
ENSG00000182504	CEP97	-1.57674	2.07673e-10	1.16961e-08
ENSG00000232133	IMPDH1P10	-1.57037	0.000619465	0.00608234
ENSG00000088970	KIZ	-1.5683	4.3543e-12	3.38721e-10
ENSG00000165312	OTUD1	-1.5667	4.54987e-06	9.24417e-05
ENSG00000100593	ISM2	-1.56615	9.01722e-05	0.00119663
ENSG00000103044	HAS3	-1.56512	3.63271e-14	4.15841e-12
ENSG00000206172	HBA1	-1.55902	2.13882e-05	0.000348145
ENSG00000183578	TNFAIP8L3	-1.55044	0.000414387	0.0043412
ENSG00000116990	MYCL	-1.54847	6.85402e-09	2.82282e-07
ENSG00000198771	RCSD1	-1.53446	8.72369e-05	0.00116316
ENSG00000164611	PTTG1	-1.53348	1.23716e-10	7.25798e-09
ENSG00000168389	MFSD2A	-1.52032	5.13614e-16	7.08988e-14
ENSG00000159556	ISL2	-1.51669	0.000654554	0.00638236
ENSG00000140465	CYP1A1	-1.51545	3.35492e-08	1.20503e-06
ENSG00000215784	FAM72D	-1.51423	0.000318748	0.00348175
ENSG00000134569	LRP4	-1.51267	2.07399e-11	1.39721e-09
ENSG00000175183	CSRP2	-1.49434	1.27703e-09	6.07454e-08
ENSG00000164687	FABP5	-1.49167	2.05801e-12	1.72481e-10
ENSG00000112378	PERP	-1.48792	2.63072e-06	5.64642e-05
ENSG00000139625	MAP3K12	-1.48724	3.45691e-07	9.46951e-06
ENSG00000125798	FOXA2	-1.48619	1.65765e-07	4.9033e-06
ENSG00000038295	TLL1	-1.48557	9.91316e-09	3.89881e-07
ENSG00000103942	HOMER2	-1.48473	1.0123e-11	7.12662e-10
ENSG00000267279	RP11-879F14.2	-1.48365	2.24168e-07	6.41521e-06
ENSG00000196368	NUDT11	-1.48198	6.96369e-06	0.000133946
ENSG00000153561	RMND5A	-1.47817	9.04054e-14	9.7916e-12
ENSG00000179046	TRIML2	-1.47691	5.61965e-06	0.000111287
ENSG00000005469	CROT	-1.4737	8.18314e-08	2.68264e-06
ENSG00000165905	LARGE2	-1.46995	2.14299e-13	2.21863e-11
ENSG00000011426	ANLN	-1.45764	6.00483e-05	0.000844636
ENSG00000258590	NBEAP1	-1.45671	0.000608315	0.00598878
ENSG00000144815	NXPE3	-1.45649	1.34929e-10	7.85044e-09
ENSG00000047634	SCML1	-1.45645	1.73934e-08	6.51326e-07
ENSG00000169884	WNT10B	-1.44899	3.41775e-05	0.000525923
ENSG00000185519	FAM131C	-1.44863	0.000294109	0.00324026
ENSG00000116095	PLEKHA3	-1.44398	3.6184e-10	1.94455e-08
ENSG00000175920	DOK7	-1.44373	1.46527e-07	4.37097e-06
ENSG00000051108	HERPUD1	-1.44372	0.000502728	0.00511446
ENSG00000149212	SESN3	-1.44131	9.10703e-06	0.000168277
ENSG00000135338	LCA5	-1.43242	4.60549e-06	9.3437e-05
ENSG00000176659	C20orf197	-1.43029	2.41096e-05	0.00038498
ENSG00000203722	RAET1G	-1.42836	3.74235e-05	0.000569647
ENSG00000161642	ZNF385A	-1.428	4.04965e-18	8.14559e-16
ENSG00000148175	STOM	-1.42518	4.48419e-17	7.69969e-15
ENSG00000104267	CA2	-1.42483	1.27498e-12	1.10813e-10
ENSG00000169679	BUB1	-1.42464	1.55044e-05	0.000264929
ENSG00000196456	ZNF775	-1.42042	0.000252954	0.00284018
ENSG00000175063	UBE2C	-1.41278	5.44634e-07	1.42008e-05
ENSG00000139354	GAS2L3	-1.41272	0.000190005	0.00224059
ENSG00000109805	NCAPG	-1.40922	2.62973e-05	0.000416966
ENSG00000229852	RP11-398K22.12	-1.40901	4.76736e-07	1.26174e-05
ENSG00000112984	KIF20A	-1.40685	6.19381e-06	0.000121292
ENSG00000167600	CYP2S1	-1.4002	8.67065e-12	6.26065e-10
ENSG00000147650	LRP12	-1.3991	3.86118e-11	2.49383e-09
ENSG00000123485	HJURP	-1.39745	2.86294e-07	7.99804e-06
ENSG00000166851	PLK1	-1.39488	1.10509e-06	2.65523e-05
ENSG00000142945	KIF2C	-1.39401	9.71219e-06	0.000177594
ENSG00000134548	SPX	-1.38785	9.0061e-06	0.00016685
ENSG00000182782	HCAR2	-1.38668	7.92938e-09	3.17175e-07
ENSG00000173706	HEG1	-1.37674	1.974e-07	5.76637e-06
ENSG00000168078	PBK	-1.37069	2.79065e-05	0.000437554
ENSG00000166734	CASC4	-1.3694	1.10086e-12	9.68759e-11
ENSG00000087903	RFX2	-1.3585	1.22063e-07	3.73619e-06
ENSG00000280206	CTB-193M12.5	-1.35443	4.71626e-07	1.25056e-05
ENSG00000101447	FAM83D	-1.35436	7.08636e-08	2.34767e-06
ENSG00000181458	TMEM45A	-1.35351	2.10162e-06	4.65997e-05
ENSG00000086619	ERO1B	-1.35108	0.000728848	0.00696213
ENSG00000169860	P2RY1	-1.34789	2.63414e-07	7.41773e-06
ENSG00000185361	TNFAIP8L1	-1.3449	2.17506e-06	4.78513e-05
ENSG00000181019	NQO1	-1.34215	0.000132221	0.00165924
ENSG00000168528	SERINC2	-1.34185	1.96142e-16	2.81804e-14
ENSG00000254682	RP11-660L16.2	-1.33801	6.05638e-05	0.000847653
ENSG00000106366	SERPINE1	-1.33379	6.24532e-10	3.23287e-08
ENSG00000180346	TIGD2	-1.33363	1.56124e-12	1.33226e-10
ENSG00000189410	SH2D5	-1.33275	1.19208e-10	7.08522e-09
ENSG00000166265	CYYR1	-1.32851	2.19633e-08	8.05321e-07
ENSG00000141682	PMAIP1	-1.32747	5.53677e-17	9.13766e-15
ENSG00000149948	HMGA2	-1.3116	3.79533e-05	0.000576465
ENSG00000242114	MTFP1	-1.30973	0.000250755	0.00281999
ENSG00000102098	SCML2	-1.30933	0.000129455	0.00162743
ENSG00000186871	ERCC6L	-1.30015	0.000950237	0.00868224
ENSG00000111647	UHRF1BP1L	-1.29997	1.84856e-08	6.84941e-07
ENSG00000064989	CALCRL	-1.29995	8.17876e-07	2.02741e-05
ENSG00000142856	ITGB3BP	-1.2938	3.05065e-07	8.47202e-06
ENSG00000176641	RNF152	-1.28833	4.00058e-09	1.71732e-07
ENSG00000126368	NR1D1	-1.28812	0.000105411	0.0013717
ENSG00000185070	FLRT2	-1.28398	1.06247e-07	3.35417e-06
ENSG00000106714	CNTNAP3	-1.2829	0.00104756	0.00942466
ENSG00000121742	GJB6	-1.2819	4.55295e-05	0.000671966
ENSG00000115163	CENPA	-1.27992	5.67726e-05	0.000809067
ENSG00000187244	BCAM	-1.27992	2.26758e-06	4.97314e-05
ENSG00000166387	PPFIBP2	-1.27964	0.000529616	0.00533023
ENSG00000169474	SPRR1A	-1.27882	9.19093e-07	2.2545e-05
ENSG00000138442	WDR12	-1.27569	2.28734e-13	2.33375e-11
ENSG00000105376	ICAM5	-1.27423	0.000109531	0.00141616
ENSG00000082014	SMARCD3	-1.26965	0.000629447	0.00616315
ENSG00000129810	SGO1	-1.26884	5.52039e-05	0.000790713
ENSG00000118200	CAMSAP2	-1.26882	6.73132e-09	2.78756e-07
ENSG00000154227	CERS3	-1.26682	5.56983e-08	1.90348e-06
ENSG00000144893	MED12L	-1.26568	0.000557917	0.00555794
ENSG00000159873	CCDC117	-1.26494	2.97154e-12	2.41846e-10
ENSG00000072864	NDE1	-1.26451	2.67385e-13	2.68913e-11
ENSG00000145386	CCNA2	-1.26271	4.11291e-05	0.000617339
ENSG00000186185	KIF18B	-1.26163	0.000475513	0.0048799
ENSG00000115902	SLC1A4	-1.25677	1.35152e-05	0.000235804
ENSG00000166845	C18orf54	-1.25674	1.16773e-08	4.52938e-07
ENSG00000109674	NEIL3	-1.25643	4.72792e-05	0.000691987
ENSG00000179021	C3orf38	-1.2544	1.49103e-11	1.02911e-09
ENSG00000118308	LRMP	-1.25077	0.000282352	0.00313526
ENSG00000167904	TMEM68	-1.24978	8.66385e-08	2.81725e-06
ENSG00000120738	EGR1	-1.24958	1.31931e-08	5.06153e-07
ENSG00000112715	VEGFA	-1.24708	1.0544e-12	9.45599e-11
ENSG00000203993	ARRDC1-AS1	-1.24646	4.92729e-06	9.89676e-05
ENSG00000204791	SMPD5	-1.24266	0.00075226	0.00714068
ENSG00000141542	RAB40B	-1.23883	1.61708e-05	0.000273331
ENSG00000244486	SCARF2	-1.23437	7.76989e-05	0.00105294
ENSG00000164104	HMGB2	-1.23415	7.12479e-09	2.90567e-07
ENSG00000170381	SEMA3E	-1.2329	0.000114451	0.00147166
ENSG00000245648	RP11-277P12.20	-1.22982	9.82227e-06	0.000178854
ENSG00000135451	TROAP	-1.22932	1.28214e-06	3.01306e-05
ENSG00000151229	SLC2A13	-1.22345	4.25197e-05	0.000636891
ENSG00000075218	GTSE1	-1.22299	2.28449e-05	0.000367607
ENSG00000188610	FAM72B	-1.22218	5.25582e-05	0.000758217
ENSG00000119938	PPP1R3C	-1.21901	4.21443e-07	1.12812e-05
ENSG00000213390	ARHGAP19	-1.21838	7.44968e-07	1.86308e-05
ENSG00000116711	PLA2G4A	-1.21764	7.66967e-09	3.0854e-07
ENSG00000163710	PCOLCE2	-1.21593	0.000423952	0.00442494
ENSG00000121236	TRIM6	-1.21138	1.06336e-05	0.000191215
ENSG00000154263	ABCA10	-1.21078	5.97399e-05	0.000842823
ENSG00000134222	PSRC1	-1.20094	1.68551e-05	0.000282523
ENSG00000080986	NDC80	-1.19979	8.26229e-05	0.00110899
ENSG00000152661	GJA1	-1.19906	6.61457e-13	6.16775e-11
ENSG00000139211	AMIGO2	-1.19758	8.2426e-12	5.98226e-10
ENSG00000164684	ZNF704	-1.19377	1.54889e-05	0.000264929
ENSG00000164402	SEPT8	-1.18829	1.14164e-14	1.39776e-12
ENSG00000205208	C4orf46	-1.18739	8.44057e-06	0.0001572
ENSG00000167772	ANGPTL4	-1.18555	4.11706e-05	0.000617339
ENSG00000141579	ZNF750	-1.18432	6.2934e-05	0.000877337
ENSG00000111665	CDCA3	-1.18246	0.000106347	0.00137879
ENSG00000221968	FADS3	-1.18158	4.44448e-10	2.37039e-08
ENSG00000139734	DIAPH3	-1.18027	0.000111322	0.001438
ENSG00000134690	CDCA8	-1.17934	1.12458e-05	0.000200432
ENSG00000152284	TCF7L1	-1.17817	2.32569e-09	1.03955e-07
ENSG00000128641	MYO1B	-1.17534	1.52879e-14	1.80885e-12
ENSG00000137804	NUSAP1	-1.17	1.12842e-06	2.69747e-05
ENSG00000173227	SYT12	-1.16879	0.000394455	0.00417485
ENSG00000178999	AURKB	-1.16826	0.000168444	0.00203056
ENSG00000087586	AURKA	-1.16287	3.29938e-11	2.15071e-09
ENSG00000158292	GPR153	-1.16203	5.97281e-11	3.70472e-09
ENSG00000088325	TPX2	-1.15553	9.64029e-06	0.000176509
ENSG00000141391	PRELID3A	-1.15418	0.000585178	0.00578197
ENSG00000087842	PIR	-1.15407	1.02109e-06	2.47877e-05
ENSG00000129474	AJUBA	-1.15278	7.41381e-12	5.4368e-10
ENSG00000132185	FCRLA	-1.14906	0.000740659	0.00705103
ENSG00000170873	MTSS1	-1.14637	5.0015e-07	1.31628e-05
ENSG00000081985	IL12RB2	-1.14223	1.61743e-11	1.10551e-09
ENSG00000168566	SNRNP48	-1.13887	0.000223926	0.00256749
ENSG00000121957	GPSM2	-1.13781	9.63797e-08	3.07019e-06
ENSG00000086570	FAT2	-1.13693	1.37829e-09	6.51217e-08
ENSG00000068489	PRR11	-1.13431	6.03411e-05	0.000846416
ENSG00000078177	N4BP2	-1.13195	5.46331e-07	1.42187e-05
ENSG00000165490	DDIAS	-1.1305	0.000227154	0.00260238
ENSG00000107957	SH3PXD2A	-1.12994	1.2321e-09	5.95223e-08
ENSG00000166181	API5	-1.1267	1.7695e-12	1.50087e-10
ENSG00000178184	PARD6G	-1.12528	6.37717e-08	2.12271e-06
ENSG00000215251	FASTKD5	-1.12522	6.68537e-10	3.42291e-08
ENSG00000104427	ZC2HC1A	-1.11979	0.00016012	0.00194689
ENSG00000237649	KIFC1	-1.11633	1.25906e-05	0.000221317
ENSG00000161682	FAM171A2	-1.11443	0.000508098	0.00515419
ENSG00000211445	GPX3	-1.11267	1.13143e-09	5.49327e-08
ENSG00000119698	PPP4R4	-1.11121	6.57505e-06	0.000127341
ENSG00000168003	SLC3A2	-1.11018	1.70475e-05	0.000285069
ENSG00000174839	DENND6A	-1.10925	1.77618e-08	6.63358e-07
ENSG00000245848	CEBPA	-1.10885	0.000280465	0.00311677
ENSG00000130829	DUSP9	-1.10568	4.96505e-08	1.72187e-06
ENSG00000106799	TGFBR1	-1.10492	4.58684e-11	2.90913e-09
ENSG00000175745	NR2F1	-1.10416	0.000955472	0.00872442
ENSG00000158966	CACHD1	-1.10323	9.00527e-06	0.00016685
ENSG00000076382	SPAG5	-1.10278	1.58237e-05	0.000269079
ENSG00000100219	XBP1	-1.10225	4.38104e-06	8.96584e-05
ENSG00000236107	AC010127.3	-1.10029	0.000178865	0.00213065
ENSG00000134057	CCNB1	-1.09658	9.42796e-05	0.0012441
ENSG00000137941	TTLL7	-1.09376	6.71761e-05	0.000930945
ENSG00000197959	DNM3	-1.09256	0.000976532	0.00888789
ENSG00000082438	COBLL1	-1.08941	0.000152646	0.00186567
ENSG00000117399	CDC20	-1.08778	8.28748e-05	0.00111131
ENSG00000138180	CEP55	-1.0844	0.00103036	0.00928778
ENSG00000074416	MGLL	-1.08222	1.23185e-10	7.25708e-09
ENSG00000156876	SASS6	-1.08005	0.000114624	0.00147255
ENSG00000169018	FEM1B	-1.07764	8.92941e-10	4.44262e-08
ENSG00000133069	TMCC2	-1.07553	0.000108801	0.00140931
ENSG00000171295	ZNF440	-1.07097	2.68245e-07	7.53871e-06
ENSG00000142731	PLK4	-1.07041	0.00102049	0.00922832
ENSG00000118596	SLC16A7	-1.06924	0.000240807	0.00273432
ENSG00000119630	PGF	-1.06803	4.33114e-07	1.15497e-05
ENSG00000198826	ARHGAP11A	-1.06647	2.09682e-05	0.000342497
ENSG00000198729	PPP1R14C	-1.06438	1.98241e-07	5.77895e-06
ENSG00000180694	TMEM64	-1.06091	3.55579e-06	7.43915e-05
ENSG00000146054	TRIM7	-1.06044	1.11467e-06	2.6737e-05
ENSG00000160179	ABCG1	-1.05961	2.5363e-06	5.46042e-05
ENSG00000012211	PRICKLE3	-1.05771	1.42236e-08	5.44208e-07
ENSG00000181418	DDN	-1.052	0.000255246	0.00286283
ENSG00000131791	PRKAB2	-1.04921	7.46128e-05	0.001016
ENSG00000136108	CKAP2	-1.0482	2.30168e-06	5.02445e-05
ENSG00000141232	TOB1	-1.04646	0.000452174	0.00466979
ENSG00000112039	FANCE	-1.04296	6.34209e-08	2.12271e-06
ENSG00000089685	BIRC5	-1.04241	0.000232635	0.0026458
ENSG00000175471	MCTP1	-1.03889	0.000152452	0.00186492
ENSG00000173269	MMRN2	-1.03643	4.64213e-05	0.000682266
ENSG00000125898	FAM110A	-1.03601	2.60082e-06	5.59078e-05
ENSG00000136867	SLC31A2	-1.03583	6.1003e-08	2.05977e-06
ENSG00000105866	SP4	-1.03214	0.000137443	0.00171256
ENSG00000135423	GLS2	-1.03207	7.37349e-05	0.001006
ENSG00000140945	CDH13	-1.03158	0.000263899	0.00294663
ENSG00000101384	JAG1	-1.02873	7.16892e-09	2.90889e-07
ENSG00000138160	KIF11	-1.02762	0.000316993	0.00346796
ENSG00000186867	QRFPR	-1.02593	0.000324699	0.00353577
ENSG00000144749	LRIG1	-1.02569	0.000369165	0.00394673
ENSG00000047597	XK	-1.02285	2.27418e-05	0.000366366
ENSG00000135378	PRRG4	-1.01745	4.31199e-07	1.15205e-05
ENSG00000175906	ARL4D	-1.01504	1.75717e-06	3.97126e-05
ENSG00000146670	CDCA5	-1.01357	0.000152379	0.00186492
ENSG00000152413	HOMER1	-1.01306	2.24623e-08	8.21479e-07
ENSG00000152217	SETBP1	-1.00993	0.000385157	0.00409902
ENSG00000107954	NEURL1	-1.00697	0.000242904	0.00275148
ENSG00000253250	C8orf88	-1.00681	0.000309647	0.00339816
ENSG00000124102	PI3	-1.00603	1.49964e-08	5.70673e-07
ENSG00000183971	NPW	-1.00486	5.32431e-05	0.000766527
ENSG00000183762	KREMEN1	-1.00448	1.15483e-07	3.60532e-06
ENSG00000096717	SIRT1	-1.00436	8.59837e-06	0.000159927
ENSG00000213903	LTB4R	-0.997719	8.22016e-06	0.000153909
ENSG00000168398	BDKRB2	-0.997363	5.15914e-08	1.78478e-06
ENSG00000164087	POC1A	-0.996433	3.17746e-05	0.00049326
ENSG00000160161	CILP2	-0.99631	1.42918e-07	4.28147e-06
ENSG00000100644	HIF1A	-0.994499	2.85475e-09	1.26003e-07
ENSG00000161800	RACGAP1	-0.993828	7.54594e-06	0.000143966
ENSG00000103257	SLC7A5	-0.992936	8.69611e-08	2.82123e-06
ENSG00000143437	ARNT	-0.991415	2.84272e-06	6.04615e-05
ENSG00000171867	PRNP	-0.990031	7.9836e-09	3.18009e-07
ENSG00000157456	CCNB2	-0.988437	1.96833e-05	0.00032452
ENSG00000182481	KPNA2	-0.98739	0.000124433	0.00157982
ENSG00000160957	RECQL4	-0.986288	7.62724e-06	0.000144866
ENSG00000240875	LINC00886	-0.983954	0.000183594	0.00217776
ENSG00000196139	AKR1C3	-0.983243	0.000127534	0.00161047
ENSG00000114270	COL7A1	-0.982515	1.78085e-07	5.23473e-06
ENSG00000204618	RNF39	-0.981949	0.000692872	0.0067003
ENSG00000153250	RBMS1	-0.981243	1.5326e-07	4.56215e-06
ENSG00000137177	KIF13A	-0.980956	7.31206e-08	2.41676e-06
ENSG00000154839	SKA1	-0.980817	0.000805869	0.00756442
ENSG00000150347	ARID5B	-0.976623	5.11795e-05	0.000740604
ENSG00000121690	DEPDC7	-0.976399	0.000150842	0.00185328
ENSG00000144485	HES6	-0.976025	1.08872e-05	0.000195276
ENSG00000265190	ANXA8	-0.9748	1.37143e-07	4.126e-06
ENSG00000235098	ANKRD65	-0.973577	2.02418e-05	0.000332174
ENSG00000188486	H2AFX	-0.972513	0.000143701	0.00177639
ENSG00000008394	MGST1	-0.971446	0.000480925	0.00493185
ENSG00000161888	SPC24	-0.969031	0.00030407	0.00334216
ENSG00000164109	MAD2L1	-0.968997	2.78774e-05	0.000437554
ENSG00000134352	IL6ST	-0.96441	1.63023e-07	4.83235e-06
ENSG00000188372	ZP3	-0.960904	0.000154141	0.00188231
ENSG00000005448	WDR54	-0.96035	5.54411e-06	0.000109945
ENSG00000164904	ALDH7A1	-0.958577	1.29302e-08	4.97425e-07
ENSG00000184661	CDCA2	-0.958357	0.0006378	0.00623194
ENSG00000149503	INCENP	-0.955066	3.37191e-05	0.000519437
ENSG00000123975	CKS2	-0.954599	1.69445e-05	0.000283684
ENSG00000075651	PLD1	-0.95384	0.000489897	0.00500199
ENSG00000106633	GCK	-0.953384	0.000112718	0.00145202
ENSG00000159335	PTMS	-0.953269	0.000417183	0.004364
ENSG00000183688	RFLNB	-0.951403	2.68743e-05	0.000423729
ENSG00000169047	IRS1	-0.950329	1.44711e-08	5.52176e-07
ENSG00000149527	PLCH2	-0.947997	5.90302e-07	1.51946e-05
ENSG00000154127	UBASH3B	-0.944941	7.5545e-07	1.88261e-05
ENSG00000147852	VLDLR	-0.944797	2.37228e-06	5.13872e-05
ENSG00000087253	LPCAT2	-0.942619	1.40623e-05	0.00024384
ENSG00000164074	ABHD18	-0.941293	5.03749e-05	0.000730462
ENSG00000204272	NBDY	-0.938831	3.08318e-06	6.50842e-05
ENSG00000105281	SLC1A5	-0.938325	3.84796e-08	1.36472e-06
ENSG00000105088	OLFM2	-0.933771	0.000877835	0.00813898
ENSG00000088726	TMEM40	-0.933134	3.91685e-06	8.0864e-05
ENSG00000147119	CHST7	-0.932816	2.30216e-05	0.000369606
ENSG00000138182	KIF20B	-0.931613	2.34664e-06	5.10675e-05
ENSG00000234608	MAPKAPK5-AS1	-0.926769	0.000402114	0.00423151
ENSG00000163584	RPL22L1	-0.925241	0.000336346	0.00363729
ENSG00000174749	C4orf32	-0.924381	4.77016e-05	0.000697445
ENSG00000152193	RNF219	-0.924114	7.53706e-06	0.000143966
ENSG00000118523	CTGF	-0.922058	0.000175111	0.00210014
ENSG00000184702	SEPT5	-0.921917	0.00051896	0.00524925
ENSG00000198901	PRC1	-0.920776	0.000755315	0.00716151
ENSG00000128699	ORMDL1	-0.920678	1.47445e-06	3.38667e-05
ENSG00000197860	SGTB	-0.920234	0.000394654	0.00417485
ENSG00000229544	NKX1-2	-0.916788	0.000821828	0.0076886
ENSG00000084093	REST	-0.91564	3.13518e-06	6.60827e-05
ENSG00000169469	SPRR1B	-0.913461	0.000166974	0.00201456
ENSG00000166192	SENP8	-0.912617	0.000833697	0.00778929
ENSG00000168386	FILIP1L	-0.908785	7.5994e-06	0.00014479
ENSG00000198961	PJA2	-0.908628	0.000368216	0.00393957
ENSG00000123892	RAB38	-0.908045	2.40383e-07	6.82377e-06
ENSG00000056972	TRAF3IP2	-0.907804	2.11632e-05	0.000344881
ENSG00000109667	SLC2A9	-0.907398	1.05918e-06	2.55802e-05
ENSG00000009413	REV3L	-0.90727	2.19444e-07	6.31855e-06
ENSG00000185697	MYBL1	-0.907221	0.000544577	0.00544577
ENSG00000070759	TESK2	-0.906662	0.000512488	0.00519498
ENSG00000162063	CCNF	-0.906475	0.000245094	0.00276738
ENSG00000155629	PIK3AP1	-0.904032	0.000203285	0.00237531
ENSG00000072201	LNX1	-0.903431	0.000927933	0.00852826
ENSG00000075702	WDR62	-0.902184	0.000787465	0.00741905
ENSG00000123094	RASSF8	-0.899407	9.50721e-05	0.00125339
ENSG00000151692	RNF144A	-0.899345	0.000668301	0.00648496
ENSG00000138386	NAB1	-0.897766	6.45395e-08	2.1432e-06
ENSG00000100979	PLTP	-0.897627	3.01901e-09	1.32423e-07
ENSG00000104368	PLAT	-0.896703	0.000539116	0.00540731
ENSG00000137393	RNF144B	-0.896159	3.26685e-06	6.87552e-05
ENSG00000091651	ORC6	-0.895407	0.000288412	0.00318748
ENSG00000264230	ANXA8L1	-0.895044	1.15087e-05	0.00020434
ENSG00000092140	G2E3	-0.894154	7.84325e-06	0.000147835
ENSG00000129116	PALLD	-0.89342	8.76552e-08	2.83721e-06
ENSG00000112182	BACH2	-0.892351	0.00101204	0.0091696
ENSG00000065989	PDE4A	-0.891765	0.000669638	0.00649032
ENSG00000158321	AUTS2	-0.889959	1.29059e-05	0.000226013
ENSG00000100234	TIMP3	-0.888727	2.74604e-07	7.68674e-06
ENSG00000159216	RUNX1	-0.886946	1.31434e-06	3.0639e-05
ENSG00000101680	LAMA1	-0.88664	0.000231787	0.00263828
ENSG00000276256	AC011043.1	-0.884465	0.000667211	0.00648129
ENSG00000162981	FAM84A	-0.884086	0.000200858	0.00235086
ENSG00000115548	KDM3A	-0.884045	0.000681589	0.00659572
ENSG00000267260	CTD-2162K18.4	-0.883084	0.000834659	0.0077931
ENSG00000164070	HSPA4L	-0.881459	9.14384e-08	2.93939e-06
ENSG00000161036	LRWD1	-0.877166	0.000166254	0.00200932
ENSG00000173599	PC	-0.87471	2.35741e-06	5.12227e-05
ENSG00000141580	WDR45B	-0.8732	6.85656e-09	2.82282e-07
ENSG00000092621	PHGDH	-0.872609	0.000612692	0.00602003
ENSG00000082497	SERTAD4	-0.872051	0.000357352	0.00384086
ENSG00000283633	AC005301.9	-0.870927	0.000545818	0.00545431
ENSG00000108352	RAPGEFL1	-0.869308	0.000101575	0.00132792
ENSG00000141404	GNAL	-0.868875	0.000231663	0.00263828
ENSG00000108106	UBE2S	-0.868372	5.50385e-07	1.42966e-05
ENSG00000143995	MEIS1	-0.867974	0.000577879	0.00571386
ENSG00000157551	KCNJ15	-0.866002	4.98487e-05	0.000724324
ENSG00000150961	SEC24D	-0.861703	0.000122222	0.00155736
ENSG00000167536	DHRS13	-0.860387	0.000447376	0.00463166
ENSG00000171903	CYP4F11	-0.860205	0.000843854	0.00786852
ENSG00000205060	SLC35B4	-0.859536	2.2999e-06	5.02445e-05
ENSG00000059122	FLYWCH1	-0.847816	4.94647e-05	0.000719486
ENSG00000123091	RNF11	-0.846419	4.94403e-07	1.30359e-05
ENSG00000125845	BMP2	-0.844199	0.000278476	0.00309711
ENSG00000101972	STAG2	-0.843669	3.63012e-08	1.29398e-06
ENSG00000145246	ATP10D	-0.84363	1.94732e-07	5.70027e-06
ENSG00000118402	ELOVL4	-0.843183	0.000531603	0.00534641
ENSG00000127955	GNAI1	-0.842037	6.29119e-06	0.000122687
ENSG00000136152	COG3	-0.839979	0.0001996	0.00234003
ENSG00000134480	CCNH	-0.838314	1.36413e-06	3.15903e-05
ENSG00000074800	ENO1	-0.836797	0.000886211	0.00820371
ENSG00000120805	ARL1	-0.836686	1.36245e-06	3.15903e-05
ENSG00000151320	AKAP6	-0.836329	0.000776662	0.00732935
ENSG00000128604	IRF5	-0.835365	0.00031641	0.00346427
ENSG00000070814	TCOF1	-0.83155	8.13771e-06	0.000152976
ENSG00000113739	STC2	-0.829292	0.000116144	0.00149071
ENSG00000165752	STK32C	-0.828252	0.00049333	0.00502975
ENSG00000198886	MT-ND4	-0.827691	6.799e-05	0.000938544
ENSG00000113070	HBEGF	-0.827057	4.90584e-06	9.86774e-05
ENSG00000118263	KLF7	-0.821264	0.000120944	0.00154248
ENSG00000145817	YIPF5	-0.8187	0.000208268	0.002417
ENSG00000106211	HSPB1	-0.817985	0.000324358	0.0035348
ENSG00000187109	NAP1L1	-0.817815	1.55627e-07	4.62284e-06
ENSG00000178996	SNX18	-0.817761	5.99524e-05	0.000844129
ENSG00000205765	C5orf51	-0.816775	4.64792e-06	9.41622e-05
ENSG00000130734	ATG4D	-0.81442	8.0094e-06	0.000150765
ENSG00000058272	PPP1R12A	-0.812403	4.35472e-07	1.15906e-05
ENSG00000189060	H1F0	-0.808853	0.000229488	0.00262446
ENSG00000050165	DKK3	-0.805243	1.69137e-06	3.84725e-05
ENSG00000176225	RTTN	-0.804961	1.37872e-06	3.18758e-05
ENSG00000103145	HCFC1R1	-0.799753	0.000178843	0.00213065
ENSG00000168476	REEP4	-0.798847	5.10323e-06	0.00010221
ENSG00000133026	MYH10	-0.798184	1.8734e-07	5.4953e-06
ENSG00000196227	FAM217B	-0.797466	4.08215e-05	0.000614068
ENSG00000129534	MIS18BP1	-0.79693	4.56471e-05	0.000672995
ENSG00000084112	SSH1	-0.794304	5.85521e-07	1.51268e-05
ENSG00000175793	SFN	-0.792611	3.00067e-05	0.000469438
ENSG00000138069	RAB1A	-0.791287	3.861e-07	1.04433e-05
ENSG00000025772	TOMM34	-0.790664	4.42937e-07	1.17671e-05
ENSG00000006634	DBF4	-0.788833	4.02207e-05	0.000606325
ENSG00000171522	PTGER4	-0.78798	0.000242836	0.00275148
ENSG00000028839	TBPL1	-0.786059	0.000393783	0.00417354
ENSG00000165891	E2F7	-0.785785	2.72546e-05	0.000428766
ENSG00000167566	NCKAP5L	-0.785745	1.19971e-05	0.000211413
ENSG00000138162	TACC2	-0.782016	0.00034151	0.00368746
ENSG00000069956	MAPK6	-0.780256	1.0166e-05	0.000184456
ENSG00000137693	YAP1	-0.779744	4.07427e-07	1.09686e-05
ENSG00000092068	SLC7A8	-0.779138	0.000716933	0.00688099
ENSG00000140993	TIGD7	-0.778081	0.000596119	0.0058777
ENSG00000134363	FST	-0.773789	0.000712288	0.00685979
ENSG00000010292	NCAPD2	-0.769897	0.000711516	0.00685704
ENSG00000134294	SLC38A2	-0.769846	0.000145395	0.00179261
ENSG00000171208	NETO2	-0.76754	4.3093e-05	0.000644107
ENSG00000150593	PDCD4	-0.766936	0.000152129	0.00186492
ENSG00000133315	MACROD1	-0.762452	0.000722274	0.00691519
ENSG00000078902	TOLLIP	-0.761993	1.74138e-05	0.00029085
ENSG00000105928	DFNA5	-0.758917	4.42862e-06	9.02388e-05
ENSG00000110987	BCL7A	-0.758477	0.000156746	0.00190915
ENSG00000135250	SRPK2	-0.755889	9.10629e-05	0.00120504
ENSG00000166396	SERPINB7	-0.755869	0.00017792	0.00212839
ENSG00000180182	MED14	-0.755571	5.46344e-06	0.000108651
ENSG00000154102	C16orf74	-0.755357	0.000213972	0.00247147
ENSG00000184897	H1FX	-0.754341	1.36479e-05	0.000237531
ENSG00000176788	BASP1	-0.75339	8.65294e-07	2.12995e-05
ENSG00000116141	MARK1	-0.751831	0.000809395	0.00759246
ENSG00000173812	EIF1	-0.750159	0.000899313	0.00829229
ENSG00000075618	FSCN1	-0.749895	3.96362e-06	8.15904e-05
ENSG00000151135	TMEM263	-0.749772	0.000161004	0.00195594
ENSG00000105974	CAV1	-0.749623	8.43753e-05	0.00112928
ENSG00000130675	MNX1	-0.747229	0.000486362	0.00497311
ENSG00000187210	GCNT1	-0.746016	0.000752612	0.00714068
ENSG00000133619	KRBA1	-0.745917	0.000401024	0.00422572
ENSG00000013297	CLDN11	-0.745708	2.6546e-05	0.000420436
ENSG00000119950	MXI1	-0.743784	0.00028605	0.00316634
ENSG00000123416	TUBA1B	-0.743187	0.000431088	0.00448856
ENSG00000186340	THBS2	-0.743178	3.29151e-06	6.91708e-05
ENSG00000156011	PSD3	-0.742958	1.04467e-05	0.000188576
ENSG00000174564	IL20RB	-0.742422	0.000451556	0.00466807
ENSG00000179104	TMTC2	-0.742106	0.000736679	0.00701789
ENSG00000128294	TPST2	-0.73694	0.000240271	0.00273045
ENSG00000179222	MAGED1	-0.736506	2.48915e-05	0.000396912
ENSG00000164543	STK17A	-0.735739	4.49069e-05	0.000666971
ENSG00000119397	CNTRL	-0.734651	0.000178472	0.00212956
ENSG00000163623	NKX6-1	-0.731622	0.000979859	0.00890666
ENSG00000136560	TANK	-0.730648	0.000266239	0.00297041
ENSG00000075711	DLG1	-0.73004	1.99747e-05	0.000328557
ENSG00000079616	KIF22	-0.728236	1.55795e-05	0.000265568
ENSG00000134108	ARL8B	-0.727092	0.000395566	0.00417822
ENSG00000109107	ALDOC	-0.725442	6.35603e-06	0.000123609
ENSG00000012174	MBTPS2	-0.725383	8.54977e-05	0.00114105
ENSG00000123352	SPATS2	-0.724299	1.25529e-06	2.96054e-05
ENSG00000137819	PAQR5	-0.724283	0.000930533	0.00853545
ENSG00000164930	FZD6	-0.723683	1.45795e-06	3.35423e-05
ENSG00000181588	MEX3D	-0.722103	9.58378e-05	0.00125994
ENSG00000153391	INO80C	-0.718726	0.000308643	0.00338978
ENSG00000139350	NEDD1	-0.717977	2.8137e-06	5.99348e-05
ENSG00000089177	KIF16B	-0.716609	5.00834e-05	0.000726984
ENSG00000148362	C9orf142	-0.714559	0.000323084	0.00352364
ENSG00000112290	WASF1	-0.714422	3.34966e-05	0.00051714
ENSG00000085719	CPNE3	-0.71416	1.83445e-06	4.11291e-05
ENSG00000144566	RAB5A	-0.713853	0.000223776	0.00256749
ENSG00000129235	TXNDC17	-0.713767	2.15995e-06	4.76678e-05
ENSG00000087338	GMCL1	-0.713565	0.000329852	0.00358193
ENSG00000105875	WDR91	-0.712506	0.000446427	0.00462864
ENSG00000168944	CEP120	-0.709449	0.000283892	0.00314988
ENSG00000130695	CEP85	-0.7085	4.62149e-05	0.00068064
ENSG00000165474	GJB2	-0.707162	0.000542583	0.00543741
ENSG00000148925	BTBD10	-0.705707	1.8857e-05	0.000311993
ENSG00000142556	ZNF614	-0.699947	0.000376533	0.00401635
ENSG00000174791	RIN1	-0.699684	2.59928e-05	0.000413068
ENSG00000029993	HMGB3	-0.69911	0.000171413	0.00206151
ENSG00000179361	ARID3B	-0.698846	0.000134273	0.00167932
ENSG00000144895	EIF2A	-0.694434	1.10199e-05	0.000196903
ENSG00000170779	CDCA4	-0.692434	0.000391067	0.00415878
ENSG00000179833	SERTAD2	-0.69196	0.00105041	0.00944426
ENSG00000106948	AKNA	-0.689889	0.000249467	0.0028094
ENSG00000213793	ZNF888	-0.688562	0.000572765	0.00567525
ENSG00000005020	SKAP2	-0.686775	7.03032e-05	0.000968561
ENSG00000136997	MYC	-0.684413	1.11736e-05	0.000199398
ENSG00000090006	LTBP4	-0.684271	3.03613e-05	0.000474458
ENSG00000169756	LIMS1	-0.683218	6.46536e-05	0.000898641
ENSG00000153767	GTF2E1	-0.682383	0.000411829	0.00431762
ENSG00000081913	PHLPP1	-0.681353	0.000559547	0.00556778
ENSG00000100504	PYGL	-0.680678	1.65271e-05	0.000278685
ENSG00000068078	FGFR3	-0.679219	3.65229e-05	0.000558324
ENSG00000147364	FBXO25	-0.678438	0.000504268	0.00512642
ENSG00000104419	NDRG1	-0.675386	0.000203929	0.00238086
ENSG00000103064	SLC7A6	-0.675353	0.000104022	0.00135488
ENSG00000137337	MDC1	-0.673546	0.000182836	0.0021706
ENSG00000087470	DNM1L	-0.673186	4.01474e-06	8.2522e-05
ENSG00000150687	PRSS23	-0.672395	0.000431323	0.00448856
ENSG00000117114	ADGRL2	-0.672019	0.000205504	0.0023933
ENSG00000065559	MAP2K4	-0.671895	4.62623e-05	0.00068064
ENSG00000136811	ODF2	-0.671286	0.000557538	0.00555794
ENSG00000164649	CDCA7L	-0.670536	4.68714e-05	0.000687447
ENSG00000143753	DEGS1	-0.665164	0.000171451	0.00206151
ENSG00000167645	YIF1B	-0.664774	0.000284943	0.00315721
ENSG00000154803	FLCN	-0.664232	0.00100504	0.00911789
ENSG00000169220	RGS14	-0.66139	0.000399763	0.00421623
ENSG00000110400	NECTIN1	-0.661096	6.13722e-05	0.000858114
ENSG00000141384	TAF4B	-0.660185	0.00089074	0.00822941
ENSG00000115380	EFEMP1	-0.659583	0.000516435	0.00522747
ENSG00000066583	ISOC1	-0.657328	0.000295155	0.00324924
ENSG00000035681	NSMAF	-0.655134	0.000136576	0.00170478
ENSG00000110092	CCND1	-0.653155	1.75873e-05	0.0002934
ENSG00000001460	STPG1	-0.65227	0.000196182	0.00230187
ENSG00000167962	ZNF598	-0.64733	9.60475e-06	0.000176087
ENSG00000113312	TTC1	-0.644533	0.000127262	0.00160848
ENSG00000174013	FBXO45	-0.642256	0.000572736	0.00567525
ENSG00000198121	LPAR1	-0.639594	0.00072529	0.00693285
ENSG00000177425	PAWR	-0.637964	6.18893e-05	0.000864485
ENSG00000079387	SENP1	-0.635708	0.00017277	0.00207382
ENSG00000204859	ZBTB48	-0.635274	0.000901388	0.00830055
ENSG00000137509	PRCP	-0.634713	9.15961e-05	0.00121096
ENSG00000117407	ARTN	-0.634268	0.000274259	0.00305262
ENSG00000158526	TSR2	-0.633497	0.000249613	0.0028094
ENSG00000120053	GOT1	-0.632631	0.00112007	0.00992484
ENSG00000123933	MXD4	-0.632579	0.000669775	0.00649032
ENSG00000198780	FAM169A	-0.632328	0.000775567	0.00732394
ENSG00000064655	EYA2	-0.631439	0.00110845	0.00985303
ENSG00000099204	ABLIM1	-0.630417	1.54833e-05	0.000264929
ENSG00000196743	GM2A	-0.630042	4.45923e-05	0.000662999
ENSG00000135823	STX6	-0.629569	3.65607e-05	0.000558324
ENSG00000172053	QARS	-0.629408	0.00012281	0.00156344
ENSG00000100092	SH3BP1	-0.627604	0.000105875	0.00137648
ENSG00000116044	NFE2L2	-0.627005	0.000289025	0.00319174
ENSG00000167005	NUDT21	-0.620746	4.37179e-05	0.000652064
ENSG00000172115	CYCS	-0.618446	0.000208515	0.002417
ENSG00000082212	ME2	-0.616226	0.00011445	0.00147166
ENSG00000221829	FANCG	-0.614414	0.000633303	0.0061923
ENSG00000127580	WDR24	-0.613557	0.000473487	0.00486265
ENSG00000103187	COTL1	-0.610294	0.00012033	0.00153604
ENSG00000114331	ACAP2	-0.608069	0.000783021	0.00738442
ENSG00000137802	MAPKBP1	-0.606653	0.000622018	0.00609889
ENSG00000019144	PHLDB1	-0.605625	0.000182469	0.00216847
ENSG00000198055	GRK6	-0.605352	9.71917e-05	0.00127655
ENSG00000162714	ZNF496	-0.604896	0.000521582	0.00526417
ENSG00000112759	SLC29A1	-0.604189	0.000151709	0.00186231
ENSG00000167693	NXN	-0.600995	0.000543622	0.00544188
ENSG00000175213	ZNF408	-0.600587	0.00110375	0.00982977
ENSG00000182541	LIMK2	-0.600426	0.000161769	0.00196185
ENSG00000065911	MTHFD2	-0.599604	5.93454e-05	0.00083894
ENSG00000151929	BAG3	-0.594977	8.91616e-05	0.00118545
ENSG00000165914	TTC7B	-0.594603	0.000524593	0.00528345
ENSG00000171444	MCC	-0.593936	0.000200834	0.00235086
ENSG00000117450	PRDX1	-0.59271	0.00060091	0.0059208
ENSG00000184205	TSPYL2	-0.591403	0.000941712	0.00862674
ENSG00000094880	CDC23	-0.591203	0.000667462	0.00648129
ENSG00000116688	MFN2	-0.590291	0.000206143	0.00239677
ENSG00000156521	TYSND1	-0.589051	0.000407323	0.00427674
ENSG00000095383	TBC1D2	-0.583347	0.000484515	0.00496504
ENSG00000187840	EIF4EBP1	-0.582088	0.000504734	0.00512745
ENSG00000114416	FXR1	-0.575449	0.000320521	0.0034984
ENSG00000172380	GNG12	-0.572614	9.7711e-05	0.00128162
ENSG00000113068	PFDN1	-0.567467	0.000352142	0.00379064
ENSG00000113615	SEC24A	-0.567275	0.000707181	0.0068275
ENSG00000196396	PTPN1	-0.563414	0.000211944	0.00245409
ENSG00000112245	PTP4A1	-0.560801	0.000410802	0.00431005
ENSG00000164032	H2AFZ	-0.560346	0.000788521	0.00742137
ENSG00000213190	MLLT11	-0.560231	0.00107412	0.00962671
ENSG00000175931	UBE2O	-0.558627	0.000315819	0.00346049
ENSG00000146950	SHROOM2	-0.556857	0.000522618	0.00526733
ENSG00000173456	RNF26	-0.556426	0.00022899	0.00262128
ENSG00000101773	RBBP8	-0.556307	0.000244325	0.00276312
ENSG00000175216	CKAP5	-0.555864	0.000401264	0.00422572
ENSG00000112237	CCNC	-0.551531	0.00110847	0.00985303
ENSG00000161179	YDJC	-0.549535	0.00048518	0.00496825
ENSG00000169230	PRELID1	-0.548532	0.000244022	0.00276192
ENSG00000076924	XAB2	-0.545886	0.000266901	0.00297543
ENSG00000186184	POLR1D	-0.545005	0.000444443	0.00461147
ENSG00000085377	PREP	-0.543554	0.000187157	0.00221443
ENSG00000104881	PPP1R13L	-0.540213	0.000360123	0.00386179
ENSG00000116016	EPAS1	-0.538923	0.000561749	0.00558576
ENSG00000130787	HIP1R	-0.535971	0.000929215	0.00852891
ENSG00000107833	NPM3	-0.53082	0.00107909	0.00966509
ENSG00000075223	SEMA3C	-0.528882	0.000724264	0.00692774
ENSG00000163347	CLDN1	-0.528669	0.000943063	0.0086335
ENSG00000054965	FAM168A	-0.52701	0.000985481	0.00895199
ENSG00000060558	GNA15	-0.498439	0.000815293	0.00763761
ENSG00000108510	MED13	-0.485876	0.00111731	0.00990659
ENSG00000196712	NF1	-0.475481	0.00108317	0.00968935
ENSG00000146425	DYNLT1	0.47667	0.00112174	0.00992591
ENSG00000044115	CTNNA1	0.506316	0.00106594	0.00956562
ENSG00000143756	FBXO28	0.513543	0.000878062	0.00813898
ENSG00000111530	CAND1	0.514702	0.0010403	0.00936533
ENSG00000010404	IDS	0.520598	0.000735489	0.0070113
ENSG00000124226	RNF114	0.521687	0.000426702	0.00445035
ENSG00000100580	TMED8	0.530466	0.00105606	0.00948902
ENSG00000104689	TNFRSF10A	0.532086	0.000979216	0.00890656
ENSG00000161638	ITGA5	0.535713	0.00092864	0.00852891
ENSG00000168615	ADAM9	0.537306	0.0011223	0.00992591
ENSG00000115112	TFCP2L1	0.54211	0.000895402	0.00826705
ENSG00000167880	EVPL	0.543579	0.000392893	0.00416875
ENSG00000189266	PNRC2	0.547328	0.000539195	0.00540731
ENSG00000128591	FLNC	0.549923	0.000345699	0.0037251
ENSG00000196576	PLXNB2	0.550067	0.000972923	0.00886078
ENSG00000167470	MIDN	0.551032	0.000861122	0.00800832
ENSG00000108219	TSPAN14	0.553691	0.000656445	0.00638752
ENSG00000173801	JUP	0.556074	0.000796948	0.00749567
ENSG00000169908	TM4SF1	0.557368	0.00108679	0.0097032
ENSG00000148110	MFSD14B	0.558089	0.000608661	0.00598878
ENSG00000181885	CLDN7	0.558439	0.000889664	0.00822487
ENSG00000167173	C15orf39	0.558458	0.000248815	0.0028049
ENSG00000110931	CAMKK2	0.559528	0.000609663	0.00599445
ENSG00000072786	STK10	0.561394	0.000327953	0.00356845
ENSG00000102882	MAPK3	0.562092	0.000213694	0.00247029
ENSG00000184164	CRELD2	0.562223	0.000944622	0.00863654
ENSG00000122591	FAM126A	0.562483	0.000768759	0.0072694
ENSG00000052841	TTC17	0.564027	0.000968556	0.00883243
ENSG00000089127	OAS1	0.567498	0.00110805	0.00985303
ENSG00000138771	SHROOM3	0.567665	0.000289499	0.00319197
ENSG00000013364	MVP	0.56881	0.000230611	0.00263228
ENSG00000141458	NPC1	0.569675	0.000398858	0.00420984
ENSG00000155363	MOV10	0.569733	0.00101532	0.00919336
ENSG00000115020	PIKFYVE	0.570157	0.000764417	0.00723806
ENSG00000167107	ACSF2	0.571047	0.000533712	0.00535996
ENSG00000155066	PROM2	0.571655	0.000717947	0.00688134
ENSG00000085871	MGST2	0.572753	0.000944277	0.00863654
ENSG00000069345	DNAJA2	0.57282	0.000187627	0.00221748
ENSG00000196700	ZNF512B	0.572872	0.000202936	0.00237321
ENSG00000143850	PLEKHA6	0.5746	0.000362891	0.00388851
ENSG00000088836	SLC4A11	0.578494	0.00109587	0.00977808
ENSG00000138642	HERC6	0.580533	0.000359929	0.00386179
ENSG00000134909	ARHGAP32	0.587075	0.000532355	0.00535014
ENSG00000172183	ISG20	0.588025	0.000416692	0.0043621
ENSG00000171302	CANT1	0.588599	6.74121e-05	0.000932553
ENSG00000077514	POLD3	0.589203	0.00102978	0.00928778
ENSG00000169499	PLEKHA2	0.591885	0.000766437	0.00725231
ENSG00000183255	PTTG1IP	0.595945	0.000184197	0.00218308
ENSG00000152291	TGOLN2	0.598268	0.000744221	0.00707538
ENSG00000204439	C6orf47	0.600251	0.000460132	0.00473932
ENSG00000117472	TSPAN1	0.600665	0.000919267	0.00845413
ENSG00000147676	MAL2	0.601761	0.000626916	0.00614264
ENSG00000166348	USP54	0.602366	0.000632779	0.00619147
ENSG00000122359	ANXA11	0.603151	6.74246e-05	0.000932553
ENSG00000125347	IRF1	0.604012	5.76055e-05	0.000818579
ENSG00000180398	MCFD2	0.604589	0.00028946	0.00319197
ENSG00000101596	SMCHD1	0.604892	0.000450136	0.0046568
ENSG00000133030	MPRIP	0.609696	0.000244672	0.00276483
ENSG00000033627	ATP6V0A1	0.610039	0.000213556	0.00247029
ENSG00000146433	TMEM181	0.611317	0.000698359	0.00674872
ENSG00000204642	HLA-F	0.611963	0.000392758	0.00416875
ENSG00000145782	ATG12	0.615743	0.000231695	0.00263828
ENSG00000144136	SLC20A1	0.616176	0.000177137	0.00212083
ENSG00000198252	STYX	0.616616	0.00102563	0.00926294
ENSG00000138119	MYOF	0.617242	0.000381526	0.00406345
ENSG00000115109	EPB41L5	0.617658	0.000798747	0.00750759
ENSG00000170776	AKAP13	0.619551	0.000123838	0.00157369
ENSG00000064393	HIPK2	0.621833	0.000192019	0.00226056
ENSG00000204386	NEU1	0.625394	0.000165813	0.00200571
ENSG00000108821	COL1A1	0.626905	0.000129081	0.00162418
ENSG00000120992	LYPLA1	0.629486	0.000571165	0.00566738
ENSG00000275066	SYNRG	0.630505	7.69032e-05	0.00104416
ENSG00000169288	MRPL1	0.631868	0.000826972	0.00773159
ENSG00000076513	ANKRD13A	0.63431	8.19053e-05	0.00110146
ENSG00000196954	CASP4	0.635727	0.000986316	0.00895379
ENSG00000160213	CSTB	0.638217	0.000142362	0.00176448
ENSG00000160888	IER2	0.638806	4.01686e-05	0.000606188
ENSG00000185650	ZFP36L1	0.640406	0.000344497	0.00371687
ENSG00000151883	PARP8	0.646396	0.000652846	0.00637011
ENSG00000188706	ZDHHC9	0.648055	0.000117181	0.00150265
ENSG00000119681	LTBP2	0.652002	1.41584e-05	0.000245204
ENSG00000137842	TMEM62	0.652513	0.000261316	0.00292242
ENSG00000164078	MST1R	0.65601	0.000717584	0.00688134
ENSG00000167977	KCTD5	0.656933	0.000140719	0.00175029
ENSG00000165806	CASP7	0.658542	0.000123252	0.00156765
ENSG00000100949	RABGGTA	0.66048	3.59823e-05	0.000551886
ENSG00000160190	SLC37A1	0.662753	0.000552995	0.0055182
ENSG00000163482	STK36	0.663039	0.00102026	0.00922832
ENSG00000253276	CCDC71L	0.664489	0.000888992	0.00822405
ENSG00000068079	IFI35	0.667229	0.00067256	0.00651282
ENSG00000102218	RP2	0.667915	0.00052193	0.00526417
ENSG00000116285	ERRFI1	0.668289	1.61048e-05	0.000273143
ENSG00000117461	PIK3R3	0.668686	0.00010079	0.00131889
ENSG00000156535	CD109	0.668755	0.000140997	0.00175219
ENSG00000085832	EPS15	0.669633	0.00073031	0.00696976
ENSG00000116138	DNAJC16	0.669838	0.000748004	0.00710654
ENSG00000070190	DAPP1	0.67396	0.000128568	0.00162053
ENSG00000142687	KIAA0319L	0.675544	1.61417e-05	0.000273167
ENSG00000197603	C5orf42	0.675771	0.00016193	0.00196211
ENSG00000123240	OPTN	0.677322	5.35324e-05	0.000769905
ENSG00000158470	B4GALT5	0.678576	0.000901088	0.00830055
ENSG00000163162	RNF149	0.678714	2.2316e-05	0.000359918
ENSG00000137710	RDX	0.67917	7.29192e-05	0.000996798
ENSG00000205542	TMSB4X	0.679784	4.29582e-05	0.000642775
ENSG00000185722	ANKFY1	0.680578	0.000132469	0.00166087
ENSG00000061273	HDAC7	0.681616	1.76113e-05	0.000293452
ENSG00000138641	HERC3	0.681824	7.08993e-05	0.000973914
ENSG00000012822	CALCOCO1	0.681896	0.000172063	0.0020671
ENSG00000196182	STK40	0.684466	7.23413e-05	0.000990822
ENSG00000062282	DGAT2	0.684633	0.00011148	0.00143823
ENSG00000135655	USP15	0.692753	9.4985e-06	0.000174822
ENSG00000116791	CRYZ	0.693029	0.000125993	0.001596
ENSG00000113441	LNPEP	0.69309	0.00103193	0.00929592
ENSG00000196943	NOP9	0.693147	0.000248631	0.0028049
ENSG00000120675	DNAJC15	0.693379	7.67103e-05	0.00104255
ENSG00000127418	FGFRL1	0.694168	0.000463546	0.00476751
ENSG00000118898	PPL	0.694756	1.15313e-05	0.000204484
ENSG00000140105	WARS	0.695321	4.04801e-05	0.000609582
ENSG00000143036	SLC44A3	0.696111	0.00112809	0.00997083
ENSG00000075420	FNDC3B	0.696349	0.00014386	0.00177679
ENSG00000125637	PSD4	0.698448	3.5231e-05	0.000541542
ENSG00000170876	TMEM43	0.70093	3.23858e-05	0.000502193
ENSG00000178685	PARP10	0.701794	6.18743e-06	0.000121292
ENSG00000162368	CMPK1	0.704585	2.68659e-06	5.74074e-05
ENSG00000103160	HSDL1	0.706236	0.000859868	0.00800417
ENSG00000183723	CMTM4	0.706429	0.000490586	0.0050054
ENSG00000116396	KCNC4	0.70645	0.00112104	0.00992591
ENSG00000141449	GREB1L	0.706804	0.000423268	0.00442108
ENSG00000116661	FBXO2	0.707787	0.000207702	0.0024129
ENSG00000168672	FAM84B	0.707903	1.34138e-05	0.000234616
ENSG00000139182	CLSTN3	0.71085	0.000428928	0.00447024
ENSG00000253719	ATXN7L3B	0.712065	5.96891e-05	0.000842823
ENSG00000104447	TRPS1	0.71232	9.55623e-05	0.00125749
ENSG00000002549	LAP3	0.714288	0.000192922	0.00226929
ENSG00000114857	NKTR	0.714688	0.000460999	0.00474479
ENSG00000043143	JADE2	0.716237	4.72561e-06	9.54614e-05
ENSG00000111335	OAS2	0.717934	0.00111233	0.00988094
ENSG00000065361	ERBB3	0.719738	0.000743434	0.00707267
ENSG00000011422	PLAUR	0.720797	0.000101997	0.0013322
ENSG00000197586	ENTPD6	0.722356	5.15603e-06	0.000103121
ENSG00000138821	SLC39A8	0.722642	1.42642e-05	0.000246127
ENSG00000011347	SYT7	0.724285	0.000176835	0.00211901
ENSG00000177628	GBA	0.725614	1.98123e-06	4.41388e-05
ENSG00000137478	FCHSD2	0.72576	0.000154913	0.0018901
ENSG00000104093	DMXL2	0.730303	0.000521291	0.00526417
ENSG00000148180	GSN	0.730749	0.000221017	0.00254034
ENSG00000141524	TMC6	0.732547	2.41159e-05	0.00038498
ENSG00000073969	NSF	0.734008	5.89806e-05	0.00083462
ENSG00000162434	JAK1	0.73428	7.31757e-06	0.000140179
ENSG00000123384	LRP1	0.734739	2.67233e-05	0.000422295
ENSG00000132274	TRIM22	0.736185	5.86055e-06	0.000115732
ENSG00000186212	SOWAHB	0.741093	0.00059555	0.0058762
ENSG00000188215	DCUN1D3	0.743104	0.000939169	0.00860905
ENSG00000122863	CHST3	0.743875	6.87711e-06	0.000132644
ENSG00000182795	C1orf116	0.744302	1.6437e-06	3.75167e-05
ENSG00000134313	KIDINS220	0.745866	3.89441e-05	0.000588972
ENSG00000157106	SMG1	0.745869	1.62351e-05	0.000274089
ENSG00000134716	CYP2J2	0.745901	0.000422272	0.00441395
ENSG00000171124	FUT3	0.746858	0.000111544	0.00143823
ENSG00000183840	GPR39	0.749067	8.81568e-05	0.0011732
ENSG00000153292	ADGRF1	0.750278	1.82297e-05	0.000302682
ENSG00000145979	TBC1D7	0.750592	0.000713621	0.00686324
ENSG00000068366	ACSL4	0.750952	1.18052e-05	0.000208816
ENSG00000170540	ARL6IP1	0.752018	0.000441631	0.00458567
ENSG00000140396	NCOA2	0.752604	0.000119408	0.00152703
ENSG00000129353	SLC44A2	0.752697	4.19074e-06	8.60139e-05
ENSG00000170017	ALCAM	0.754042	2.06083e-06	4.58396e-05
ENSG00000152894	PTPRK	0.754227	1.55049e-06	3.55552e-05
ENSG00000166750	SLFN5	0.754919	8.19171e-06	0.000153728
ENSG00000151233	GXYLT1	0.755955	0.000574653	0.00568924
ENSG00000166562	SEC11C	0.757337	1.26867e-05	0.000222729
ENSG00000140564	FURIN	0.760297	1.23123e-06	2.90867e-05
ENSG00000139636	LMBR1L	0.760412	7.53518e-05	0.00102508
ENSG00000169504	CLIC4	0.763905	6.77596e-06	0.000130872
ENSG00000105514	RAB3D	0.764067	6.70884e-05	0.000930645
ENSG00000117318	ID3	0.764882	8.23614e-06	0.000154004
ENSG00000007384	RHBDF1	0.764885	6.4562e-05	0.000898255
ENSG00000100380	ST13	0.765082	2.74181e-05	0.000430857
ENSG00000003400	CASP10	0.765825	0.000710596	0.00685287
ENSG00000133401	PDZD2	0.766846	3.57402e-05	0.000548771
ENSG00000120686	UFM1	0.769705	9.54287e-05	0.00125691
ENSG00000136830	FAM129B	0.769853	2.14877e-05	0.000349362
ENSG00000122678	POLM	0.770989	0.000801806	0.00753131
ENSG00000110446	SLC15A3	0.772248	3.16999e-05	0.000492643
ENSG00000112419	PHACTR2	0.774432	2.1609e-05	0.000350928
ENSG00000078804	TP53INP2	0.774859	0.000143293	0.00177291
ENSG00000101017	CD40	0.775917	3.65541e-06	7.62492e-05
ENSG00000264364	DYNLL2	0.776047	3.39697e-07	9.35996e-06
ENSG00000101846	STS	0.776355	0.000215629	0.00248653
ENSG00000080371	RAB21	0.778115	0.0011023	0.00982302
ENSG00000101367	MAPRE1	0.778625	3.90573e-07	1.0535e-05
ENSG00000110047	EHD1	0.779182	8.36132e-06	0.00015593
ENSG00000204130	RUFY2	0.78293	0.000439651	0.00456847
ENSG00000106443	PHF14	0.783454	9.80933e-06	0.000178854
ENSG00000149418	ST14	0.783623	7.2313e-07	1.8208e-05
ENSG00000104783	KCNN4	0.785213	2.73877e-06	5.84271e-05
ENSG00000187583	PLEKHN1	0.787811	0.000315002	0.00345423
ENSG00000109929	SC5D	0.789868	0.000345789	0.0037251
ENSG00000196549	MME	0.791537	1.00873e-06	2.45302e-05
ENSG00000035687	ADSS	0.791821	3.25687e-05	0.000504254
ENSG00000134318	ROCK2	0.792766	2.13162e-06	4.71905e-05
ENSG00000168016	TRANK1	0.793404	1.48159e-05	0.0002544
ENSG00000130741	EIF2S3	0.794619	2.64992e-06	5.67898e-05
ENSG00000148671	ADIRF	0.795371	7.42085e-05	0.00101148
ENSG00000172818	OVOL1	0.797231	0.000125404	0.00159071
ENSG00000067082	KLF6	0.797675	1.36177e-07	4.10607e-06
ENSG00000086062	B4GALT1	0.798732	6.8887e-06	0.000132685
ENSG00000185338	SOCS1	0.799022	0.000870047	0.00808598
ENSG00000145349	CAMK2D	0.799275	1.98728e-07	5.78119e-06
ENSG00000150457	LATS2	0.800402	5.77276e-05	0.000818579
ENSG00000116701	NCF2	0.801901	7.01134e-06	0.000134679
ENSG00000104691	UBXN8	0.803094	0.00111484	0.00989092
ENSG00000151718	WWC2	0.804063	3.69026e-05	0.000562325
ENSG00000092820	EZR	0.805323	7.33258e-07	1.84033e-05
ENSG00000143624	INTS3	0.805726	0.000106203	0.00137875
ENSG00000146281	PM20D2	0.807316	2.87597e-05	0.000450429
ENSG00000198087	CD2AP	0.807684	1.53249e-05	0.00026282
ENSG00000256771	ZNF253	0.807939	0.000146933	0.00180841
ENSG00000154217	PITPNC1	0.810096	2.58995e-05	0.000412051
ENSG00000198794	SCAMP5	0.81162	1.11714e-06	2.67506e-05
ENSG00000065243	PKN2	0.812895	6.30984e-06	0.00012288
ENSG00000185630	PBX1	0.814431	0.000488261	0.00498891
ENSG00000091622	PITPNM3	0.815867	8.76727e-05	0.00116786
ENSG00000184007	PTP4A2	0.816252	2.68689e-06	5.74074e-05
ENSG00000166128	RAB8B	0.818571	3.94061e-06	8.12354e-05
ENSG00000111846	GCNT2	0.819168	7.34879e-05	0.0010036
ENSG00000134243	SORT1	0.820141	1.61208e-05	0.000273143
ENSG00000106868	SUSD1	0.820153	0.000811477	0.00760692
ENSG00000186834	HEXIM1	0.82052	9.19667e-08	2.94294e-06
ENSG00000101460	MAP1LC3A	0.821479	0.00024204	0.00274611
ENSG00000138756	BMP2K	0.82152	5.64479e-05	0.000806025
ENSG00000225492	GBP1P1	0.823651	3.9982e-05	0.000604021
ENSG00000196141	SPATS2L	0.825338	1.15872e-07	3.60948e-06
ENSG00000177106	EPS8L2	0.826139	9.18412e-08	2.94294e-06
ENSG00000196776	CD47	0.826667	0.000574985	0.00568924
ENSG00000159314	ARHGAP27	0.827999	3.30526e-06	6.93563e-05
ENSG00000124201	ZNFX1	0.828017	1.78922e-06	4.03075e-05
ENSG00000162757	C1orf74	0.82886	2.18017e-05	0.000352543
ENSG00000131650	KREMEN2	0.83156	3.8129e-05	0.000577886
ENSG00000128567	PODXL	0.831766	6.36974e-08	2.12271e-06
ENSG00000124225	PMEPA1	0.831948	6.279e-05	0.000876197
ENSG00000164342	TLR3	0.832429	2.17027e-06	4.78207e-05
ENSG00000076685	NT5C2	0.83275	3.76708e-06	7.83464e-05
ENSG00000188171	ZNF626	0.832869	0.00035983	0.00386179
ENSG00000178726	THBD	0.833957	0.000170513	0.00205374
ENSG00000139410	SDSL	0.834168	9.06874e-05	0.0012012
ENSG00000164855	TMEM184A	0.834233	0.000141629	0.00175695
ENSG00000135480	KRT7	0.834257	0.000109473	0.00141616
ENSG00000157617	C2CD2	0.834838	7.08357e-05	0.000973914
ENSG00000138772	ANXA3	0.835969	1.81341e-06	4.07222e-05
ENSG00000110057	UNC93B1	0.836907	1.18475e-05	0.000209038
ENSG00000137962	ARHGAP29	0.837001	2.40753e-05	0.00038498
ENSG00000143776	CDC42BPA	0.840363	1.34841e-05	0.000235554
ENSG00000165959	CLMN	0.843637	1.07666e-05	0.000193359
ENSG00000070214	SLC44A1	0.84382	7.63256e-08	2.51678e-06
ENSG00000102699	PARP4	0.844106	0.000285001	0.00315721
ENSG00000185022	MAFF	0.844591	1.38746e-05	0.00024088
ENSG00000092929	UNC13D	0.84461	2.17169e-05	0.000352161
ENSG00000127914	AKAP9	0.846417	7.74531e-06	0.000146189
ENSG00000130707	ASS1	0.846885	0.000149041	0.00183275
ENSG00000132294	EFR3A	0.847994	2.89157e-07	8.06204e-06
ENSG00000137411	VARS2	0.853093	1.30761e-07	3.96791e-06
ENSG00000172456	FGGY	0.855106	0.0003527	0.00379375
ENSG00000153179	RASSF3	0.855296	0.000128675	0.00162053
ENSG00000145715	RASA1	0.856452	0.000329955	0.00358193
ENSG00000171940	ZNF217	0.856921	3.22136e-07	8.91096e-06
ENSG00000136068	FLNB	0.857376	7.06362e-06	0.000135498
ENSG00000166689	PLEKHA7	0.857828	6.02827e-07	1.54605e-05
ENSG00000176406	RIMS2	0.857929	1.03033e-05	0.000186226
ENSG00000136689	IL1RN	0.858084	1.81139e-05	0.000301115
ENSG00000108256	NUFIP2	0.860605	6.98872e-07	1.76663e-05
ENSG00000185088	RPS27L	0.865134	3.64713e-06	7.61893e-05
ENSG00000177000	MTHFR	0.866006	5.30689e-06	0.000105837
ENSG00000133466	C1QTNF6	0.871815	1.37677e-07	4.13323e-06
ENSG00000171345	KRT19	0.875834	5.32598e-07	1.39646e-05
ENSG00000137504	CREBZF	0.877574	5.78791e-05	0.000819857
ENSG00000139725	RHOF	0.877693	1.65082e-06	3.76108e-05
ENSG00000153214	TMEM87B	0.879197	7.23043e-05	0.000990822
ENSG00000172037	LAMB2	0.879374	1.31628e-07	3.98564e-06
ENSG00000133106	EPSTI1	0.879735	2.26666e-06	4.97314e-05
ENSG00000121653	MAPK8IP1	0.879739	1.13285e-05	0.000201651
ENSG00000166147	FBN1	0.883001	0.000759382	0.00719522
ENSG00000100902	PSMA6	0.885828	5.99374e-05	0.000844129
ENSG00000167105	TMEM92	0.885862	3.50967e-06	7.3536e-05
ENSG00000075213	SEMA3A	0.886682	1.15254e-07	3.60532e-06
ENSG00000132003	ZSWIM4	0.89118	1.08886e-06	2.62071e-05
ENSG00000221963	APOL6	0.892961	6.0176e-05	0.000845587
ENSG00000113272	THG1L	0.896077	8.02933e-07	1.9974e-05
ENSG00000188811	NHLRC3	0.896854	0.000318715	0.00348175
ENSG00000110911	SLC11A2	0.899086	2.03183e-05	0.000332653
ENSG00000114127	XRN1	0.900135	0.000666943	0.00648129
ENSG00000136100	VPS36	0.900192	0.00014581	0.00179616
ENSG00000143320	CRABP2	0.901411	8.23488e-05	0.00110637
ENSG00000159871	LYPD5	0.901559	0.000642292	0.00627147
ENSG00000237523	LINC00857	0.901909	5.5321e-05	0.000791585
ENSG00000113504	SLC12A7	0.90336	1.72038e-08	6.45947e-07
ENSG00000204397	CARD16	0.905481	1.7715e-05	0.000294831
ENSG00000187231	SESTD1	0.90683	0.000214249	0.00247265
ENSG00000185561	TLCD2	0.907263	9.37244e-05	0.00123794
ENSG00000122861	PLAU	0.908487	0.00108617	0.0097032
ENSG00000176532	PRR15	0.912958	1.28397e-06	3.01306e-05
ENSG00000179913	B3GNT3	0.913557	7.63429e-06	0.000144866
ENSG00000170677	SOCS6	0.915717	2.21741e-07	6.37165e-06
ENSG00000115221	ITGB6	0.917388	3.64205e-05	0.000557393
ENSG00000102996	MMP15	0.917703	5.93501e-09	2.47967e-07
ENSG00000107201	DDX58	0.918141	0.000287258	0.00317721
ENSG00000138496	PARP9	0.918906	4.34935e-05	0.000649405
ENSG00000197930	ERO1A	0.919448	3.62946e-05	0.00055607
ENSG00000109756	RAPGEF2	0.920921	8.32867e-07	2.06094e-05
ENSG00000168062	BATF2	0.922402	0.000972228	0.00886018
ENSG00000168140	VASN	0.9292	2.17349e-05	0.000352161
ENSG00000147010	SH3KBP1	0.929734	1.33508e-06	3.1071e-05
ENSG00000196562	SULF2	0.930001	2.18086e-05	0.000352543
ENSG00000172824	CES4A	0.930056	0.000836345	0.00780367
ENSG00000157379	DHRS1	0.932472	1.26336e-06	2.97459e-05
ENSG00000128923	MINDY2	0.933063	0.000205748	0.00239415
ENSG00000117016	RIMS3	0.934571	0.000656318	0.00638752
ENSG00000167306	MYO5B	0.935816	5.30614e-10	2.77734e-08
ENSG00000164951	PDP1	0.936237	8.59091e-08	2.8e-06
ENSG00000184292	TACSTD2	0.938307	4.81398e-08	1.6736e-06
ENSG00000273706	LHX1	0.940698	6.03552e-05	0.000846416
ENSG00000164620	RELL2	0.944136	4.83949e-06	9.74821e-05
ENSG00000177380	PPFIA3	0.944778	3.25903e-05	0.000504254
ENSG00000146376	ARHGAP18	0.945528	6.41613e-06	0.000124606
ENSG00000185567	AHNAK2	0.946471	9.62131e-07	2.35188e-05
ENSG00000102981	PARD6A	0.94651	5.50591e-05	0.000790247
ENSG00000170955	PRKCDBP	0.947012	0.000372154	0.00397567
ENSG00000142166	IFNAR1	0.947104	6.10416e-07	1.56266e-05
ENSG00000162545	CAMK2N1	0.948962	8.53858e-10	4.27841e-08
ENSG00000197892	KIF13B	0.951125	1.54044e-09	7.15821e-08
ENSG00000176834	VSIG10	0.953184	5.8958e-07	1.51946e-05
ENSG00000106078	COBL	0.954138	0.00018773	0.00221748
ENSG00000165169	DYNLT3	0.95627	5.05445e-06	0.000101377
ENSG00000185339	TCN2	0.957934	3.57285e-07	9.69282e-06
ENSG00000136603	SKIL	0.958042	1.0245e-05	0.00018565
ENSG00000198363	ASPH	0.961438	1.90782e-09	8.77847e-08
ENSG00000164920	OSR2	0.962692	2.23841e-07	6.41521e-06
ENSG00000105523	FAM83E	0.96274	5.38465e-05	0.000773632
ENSG00000107186	MPDZ	0.963651	1.178e-06	2.79229e-05
ENSG00000071575	TRIB2	0.966733	4.40974e-05	0.000656935
ENSG00000130508	PXDN	0.967299	7.65167e-09	3.0854e-07
ENSG00000157601	MX1	0.970741	0.000133853	0.00167673
ENSG00000123609	NMI	0.972739	9.69776e-09	3.82477e-07
ENSG00000168679	SLC16A4	0.973476	5.22726e-07	1.37313e-05
ENSG00000105993	DNAJB6	0.97562	1.15892e-08	4.51392e-07
ENSG00000115295	CLIP4	0.976602	6.53754e-07	1.66453e-05
ENSG00000150540	HNMT	0.976751	8.369e-05	0.00112117
ENSG00000111319	SCNN1A	0.981406	2.96508e-10	1.61815e-08
ENSG00000259673	IQCH-AS1	0.983199	0.000205396	0.0023933
ENSG00000156453	PCDH1	0.984131	4.64891e-05	0.000682551
ENSG00000164308	ERAP2	0.984648	9.0218e-08	2.9068e-06
ENSG00000033170	FUT8	0.984879	0.000263618	0.00294582
ENSG00000152056	AP1S3	0.988171	8.37179e-07	2.06798e-05
ENSG00000107164	FUBP3	0.988372	7.7614e-09	3.11341e-07
ENSG00000138111	MFSD13A	0.988993	1.08115e-07	3.40551e-06
ENSG00000112697	TMEM30A	0.991967	6.69614e-07	1.69571e-05
ENSG00000176845	METRNL	0.994591	2.85079e-06	6.05417e-05
ENSG00000033178	UBA6	0.998518	0.00105751	0.00949597
ENSG00000134531	EMP1	0.998538	3.41428e-08	1.22323e-06
ENSG00000213722	DDAH2	0.999421	2.62902e-08	9.48872e-07
ENSG00000115648	MLPH	1.00107	3.77397e-05	0.000573839
ENSG00000204839	MROH6	1.0015	5.29116e-09	2.21725e-07
ENSG00000147394	ZNF185	1.00205	2.03077e-09	9.25347e-08
ENSG00000170542	SERPINB9	1.0049	0.000871914	0.00809798
ENSG00000126561	STAT5A	1.01159	1.44356e-07	4.31537e-06
ENSG00000151612	ZNF827	1.02029	2.56846e-07	7.26184e-06
ENSG00000111077	TNS2	1.02036	2.44513e-06	5.28027e-05
ENSG00000148154	UGCG	1.02107	0.000158989	0.00193481
ENSG00000213064	SFT2D2	1.02364	7.2746e-05	0.000995397
ENSG00000115525	ST3GAL5	1.02605	0.000220739	0.00254034
ENSG00000178750	STX19	1.02657	2.69184e-05	0.00042395
ENSG00000170345	FOS	1.02706	1.65493e-05	0.000278725
ENSG00000185010	F8	1.02791	3.80241e-05	0.000576917
ENSG00000125398	SOX9	1.02862	1.10548e-09	5.40456e-08
ENSG00000133639	BTG1	1.02905	2.51767e-07	7.13256e-06
ENSG00000181634	TNFSF15	1.02974	3.52205e-07	9.60575e-06
ENSG00000117226	GBP3	1.03003	0.000139795	0.00174033
ENSG00000182612	TSPAN10	1.03432	0.00016687	0.00201456
ENSG00000187957	DNER	1.03458	5.23635e-05	0.000756182
ENSG00000171346	KRT15	1.03553	0.000126047	0.001596
ENSG00000226137	BAIAP2-AS1	1.03729	0.000403778	0.00424585
ENSG00000067208	EVI5	1.03785	0.000859711	0.00800417
ENSG00000106034	CPED1	1.03887	0.000259296	0.00290445
ENSG00000169247	SH3TC2	1.04243	4.91275e-05	0.000715321
ENSG00000014914	MTMR11	1.04266	1.41411e-06	3.26405e-05
ENSG00000248383	PCDHAC1	1.04516	1.9826e-05	0.000326491
ENSG00000211459	MT-RNR1	1.04739	0.000655513	0.00638729
ENSG00000185404	SP140L	1.05171	9.95782e-07	2.42571e-05
ENSG00000008517	IL32	1.05253	1.03024e-05	0.000186226
ENSG00000125772	GPCPD1	1.05287	5.89946e-08	2.00155e-06
ENSG00000152242	C18orf25	1.05419	4.77847e-08	1.66537e-06
ENSG00000163898	LIPH	1.0573	6.88194e-09	2.82501e-07
ENSG00000173821	RNF213	1.05886	0.00044711	0.00463166
ENSG00000261068	RP11-7K24.3	1.06078	0.00111301	0.00988094
ENSG00000135052	GOLM1	1.06162	3.31811e-11	2.15295e-09
ENSG00000185621	LMLN	1.06435	1.47463e-05	0.000253514
ENSG00000157111	TMEM171	1.06557	0.000182393	0.00216847
ENSG00000184792	OSBP2	1.06557	2.10384e-07	6.08256e-06
ENSG00000184226	PCDH9	1.06724	0.000818504	0.00766259
ENSG00000070404	FSTL3	1.06829	1.64402e-06	3.75167e-05
ENSG00000247556	OIP5-AS1	1.06995	2.27032e-08	8.28139e-07
ENSG00000180340	FZD2	1.07015	2.43725e-08	8.84444e-07
ENSG00000166535	A2ML1	1.07146	2.94753e-09	1.29691e-07
ENSG00000138759	FRAS1	1.07267	1.27207e-05	0.000223047
ENSG00000100311	PDGFB	1.07313	1.25135e-07	3.81363e-06
ENSG00000119636	BBOF1	1.07671	5.76646e-05	0.000818579
ENSG00000102531	FNDC3A	1.07863	1.47983e-10	8.53936e-09
ENSG00000145293	ENOPH1	1.07893	2.63501e-08	9.48872e-07
ENSG00000182578	CSF1R	1.07906	9.00986e-05	0.00119663
ENSG00000177570	SAMD12	1.08208	1.30874e-06	3.05615e-05
ENSG00000073350	LLGL2	1.0839	8.12703e-11	4.93227e-09
ENSG00000049089	COL9A2	1.08549	5.65019e-05	0.000806025
ENSG00000108960	MMD	1.08592	0.000714384	0.00686589
ENSG00000104140	RHOV	1.08629	7.61687e-06	0.000144866
ENSG00000005001	PRSS22	1.08668	7.48322e-06	0.000143157
ENSG00000197106	SLC6A17	1.0888	3.29272e-05	0.000508908
ENSG00000136052	SLC41A2	1.0909	1.60463e-05	0.000272536
ENSG00000183486	MX2	1.09328	0.000546806	0.0054603
ENSG00000119778	ATAD2B	1.0954	5.4248e-07	1.41709e-05
ENSG00000115129	TP53I3	1.09905	1.05718e-07	3.34497e-06
ENSG00000172123	SLFN12	1.09914	0.000223162	0.0025629
ENSG00000003989	SLC7A2	1.10226	6.04077e-06	0.000118791
ENSG00000167889	MGAT5B	1.10236	1.05226e-06	2.54567e-05
ENSG00000136002	ARHGEF4	1.10262	6.62681e-07	1.68118e-05
ENSG00000239713	APOBEC3G	1.10336	7.51599e-07	1.87633e-05
ENSG00000158528	PPP1R9A	1.10406	0.000120128	0.00153485
ENSG00000159753	CARMIL2	1.10521	0.000367144	0.00393109
ENSG00000185090	MANEAL	1.10524	1.24405e-09	5.97399e-08
ENSG00000140848	CPNE2	1.10616	2.20455e-11	1.4781e-09
ENSG00000237807	RP11-400K9.4	1.10623	0.000261116	0.00292242
ENSG00000136514	RTP4	1.10747	4.1613e-10	2.2278e-08
ENSG00000134326	CMPK2	1.10757	1.5194e-08	5.76633e-07
ENSG00000021355	SERPINB1	1.11596	2.91169e-06	6.17419e-05
ENSG00000156273	BACH1	1.11752	1.35388e-06	3.14565e-05
ENSG00000131711	MAP1B	1.11801	2.10211e-05	0.000342963
ENSG00000151575	TEX9	1.11932	5.26974e-05	0.000759447
ENSG00000181381	DDX60L	1.11953	1.76159e-06	3.97488e-05
ENSG00000129667	RHBDF2	1.11981	4.05404e-11	2.60643e-09
ENSG00000174125	TLR1	1.12232	0.00011732	0.00150307
ENSG00000151470	C4orf33	1.12303	1.17681e-06	2.79229e-05
ENSG00000175505	CLCF1	1.12389	2.50066e-05	0.000398295
ENSG00000184922	FMNL1	1.12705	1.12575e-09	5.48465e-08
ENSG00000133328	HRASLS2	1.12831	1.30885e-06	3.05615e-05
ENSG00000167723	TRPV3	1.12837	0.000455206	0.00469546
ENSG00000283178	AL590763.16	1.13358	9.58279e-06	0.000176084
ENSG00000116962	NID1	1.13529	4.56307e-13	4.40055e-11
ENSG00000115919	KYNU	1.14363	4.53143e-05	0.000669492
ENSG00000079385	CEACAM1	1.14594	4.31798e-12	3.38721e-10
ENSG00000172031	EPHX4	1.14712	1.42166e-05	0.000245669
ENSG00000129595	EPB41L4A	1.14835	7.65769e-06	0.000145115
ENSG00000177054	ZDHHC13	1.15109	1.02223e-08	4.00918e-07
ENSG00000135074	ADAM19	1.15405	1.93813e-05	0.000320292
ENSG00000172602	RND1	1.15458	0.000117666	0.00150612
ENSG00000204396	VWA7	1.15541	0.000126702	0.00160285
ENSG00000169583	CLIC3	1.15682	0.000452386	0.00466979
ENSG00000122643	NT5C3A	1.15796	1.1708e-07	3.63104e-06
ENSG00000197417	SHPK	1.16074	3.36135e-05	0.000518377
ENSG00000198732	SMOC1	1.16189	0.000142583	0.00176567
ENSG00000131037	EPS8L1	1.16874	4.82762e-15	6.06901e-13
ENSG00000163888	CAMK2N2	1.17296	0.000128082	0.00161594
ENSG00000138678	GPAT3	1.17377	4.50902e-05	0.000668256
ENSG00000139055	ERP27	1.17893	0.000787747	0.00741905
ENSG00000114405	C3orf14	1.18027	8.39993e-08	2.74411e-06
ENSG00000131016	AKAP12	1.18141	0.000141364	0.00175521
ENSG00000035862	TIMP2	1.18154	9.49207e-12	6.716e-10
ENSG00000165389	SPTSSA	1.18237	7.62032e-12	5.55928e-10
ENSG00000054179	ENTPD2	1.18246	1.64695e-08	6.20029e-07
ENSG00000096968	JAK2	1.18337	3.71122e-06	7.72987e-05
ENSG00000175130	MARCKSL1	1.18347	1.42229e-12	1.22109e-10
ENSG00000143217	NECTIN4	1.18389	8.34572e-06	0.000155846
ENSG00000002587	HS3ST1	1.1843	8.80515e-10	4.39633e-08
ENSG00000115616	SLC9A2	1.19202	0.00108193	0.00968441
ENSG00000107262	BAG1	1.19294	2.56618e-10	1.42813e-08
ENSG00000054392	HHAT	1.19445	3.12128e-05	0.000486146
ENSG00000153234	NR4A2	1.19582	9.93504e-07	2.42436e-05
ENSG00000105855	ITGB8	1.20214	6.79911e-05	0.000938544
ENSG00000119917	IFIT3	1.20382	2.73308e-07	7.6657e-06
ENSG00000099822	HCN2	1.20395	2.40138e-05	0.000384658
ENSG00000251169	LINC01843	1.20554	6.82855e-05	0.000941685
ENSG00000223768	LINC00205	1.2064	0.000713503	0.00686324
ENSG00000184898	RBM43	1.20706	6.19281e-06	0.000121292
ENSG00000203797	DDO	1.20747	0.00045707	0.00471124
ENSG00000134755	DSC2	1.21465	5.18223e-10	2.7226e-08
ENSG00000137462	TLR2	1.21587	4.40967e-06	9.00057e-05
ENSG00000057657	PRDM1	1.21779	6.24614e-07	1.59611e-05
ENSG00000175147	TMEM51-AS1	1.21783	4.71914e-05	0.00069142
ENSG00000269825	CTD-3099C6.9	1.2187	0.000161616	0.00196168
ENSG00000197557	TTC30A	1.21964	5.16227e-05	0.00074625
ENSG00000258791	LINC00520	1.22094	3.66458e-05	0.000559017
ENSG00000137486	ARRB1	1.22143	0.000392456	0.00416875
ENSG00000105339	DENND3	1.22152	6.96872e-12	5.13715e-10
ENSG00000072310	SREBF1	1.22202	5.70822e-11	3.57208e-09
ENSG00000176454	LPCAT4	1.224	9.46147e-10	4.6743e-08
ENSG00000119125	GDA	1.22857	4.78566e-05	0.000698985
ENSG00000169231	THBS3	1.22932	4.49815e-05	0.000667376
ENSG00000117228	GBP1	1.23082	2.27588e-07	6.48673e-06
ENSG00000120217	CD274	1.23465	3.48648e-09	1.50582e-07
ENSG00000157873	TNFRSF14	1.23948	3.77229e-08	1.34126e-06
ENSG00000111057	KRT18	1.23996	5.92047e-08	2.00385e-06
ENSG00000148346	LCN2	1.24111	0.000188716	0.00222727
ENSG00000135549	PKIB	1.25038	4.41079e-06	9.00057e-05
ENSG00000073803	MAP3K13	1.25093	3.59115e-08	1.28333e-06
ENSG00000149573	MPZL2	1.26359	2.61284e-11	1.74354e-09
ENSG00000171604	CXXC5	1.26485	2.15079e-06	4.75402e-05
ENSG00000221926	TRIM16	1.26923	3.44429e-14	3.97505e-12
ENSG00000135932	CAB39	1.2736	4.20245e-08	1.47926e-06
ENSG00000141279	NPEPPS	1.27412	3.78247e-12	3.00888e-10
ENSG00000137648	TMPRSS4	1.27433	7.07898e-10	3.59827e-08
ENSG00000148798	INA	1.27781	7.26035e-14	8.04927e-12
ENSG00000114378	HYAL1	1.27866	0.000329023	0.00357733
ENSG00000189433	GJB4	1.28255	9.5921e-06	0.000176084
ENSG00000144228	SPOPL	1.29051	4.43248e-08	1.55634e-06
ENSG00000144366	GULP1	1.29079	5.77307e-05	0.000818579
ENSG00000172936	MYD88	1.29711	1.13136e-06	2.69993e-05
ENSG00000159921	GNE	1.30087	5.91772e-07	1.52047e-05
ENSG00000143153	ATP1B1	1.30591	1.67294e-05	0.000281086
ENSG00000123612	ACVR1C	1.30639	0.00017834	0.00212956
ENSG00000134339	SAA2	1.30916	1.42202e-05	0.000245669
ENSG00000185386	MAPK11	1.31356	1.49399e-10	8.5859e-09
ENSG00000129757	CDKN1C	1.31536	0.000230698	0.00263228
ENSG00000169248	CXCL11	1.31867	0.000137078	0.00170952
ENSG00000167861	HID1	1.33004	5.51354e-07	1.42966e-05
ENSG00000156675	RAB11FIP1	1.33961	4.3219e-18	8.57076e-16
ENSG00000198513	ATL1	1.33977	1.21445e-06	2.87385e-05
ENSG00000124171	PARD6B	1.34099	4.09484e-07	1.10029e-05
ENSG00000168961	LGALS9	1.3413	7.1216e-14	7.95811e-12
ENSG00000143375	CGN	1.34167	4.99959e-18	9.77698e-16
ENSG00000149218	ENDOD1	1.34348	1.40228e-09	6.58138e-08
ENSG00000092295	TGM1	1.34538	7.33379e-17	1.16022e-14
ENSG00000102879	CORO1A	1.34839	1.38721e-09	6.53243e-08
ENSG00000137198	GMPR	1.35014	1.07816e-12	9.58384e-11
ENSG00000181392	SYNE4	1.35272	0.00110068	0.00981476
ENSG00000238045	AC009133.12	1.3528	0.000395476	0.00417822
ENSG00000125730	C3	1.35587	1.87658e-05	0.000310849
ENSG00000087495	PHACTR3	1.35835	2.37625e-06	5.13943e-05
ENSG00000088002	SULT2B1	1.35912	5.12561e-09	2.16074e-07
ENSG00000143033	MTF2	1.3668	8.0826e-14	8.89086e-12
ENSG00000164124	TMEM144	1.37425	3.75801e-09	1.61813e-07
ENSG00000110375	UPK2	1.37426	1.96639e-05	0.00032452
ENSG00000272463	RP11-532F6.3	1.37428	4.41378e-05	0.000656935
ENSG00000182585	EPGN	1.37485	3.86733e-08	1.36814e-06
ENSG00000120055	C10orf95	1.37586	6.50509e-06	0.000126159
ENSG00000124766	SOX4	1.37941	5.90055e-06	0.000116358
ENSG00000172243	CLEC7A	1.38513	6.25616e-06	0.000122343
ENSG00000181444	ZNF467	1.38652	6.30503e-05	0.000878089
ENSG00000104381	GDAP1	1.38986	9.06836e-12	6.48134e-10
ENSG00000184254	ALDH1A3	1.39094	1.26931e-08	4.8964e-07
ENSG00000176485	PLA2G16	1.39259	4.68296e-15	5.94018e-13
ENSG00000136059	VILL	1.39612	1.14771e-05	0.000204036
ENSG00000099994	SUSD2	1.39667	7.42305e-07	1.85972e-05
ENSG00000168993	CPLX1	1.40135	5.01673e-10	2.65547e-08
ENSG00000243649	CFB	1.4016	9.05109e-06	0.000167463
ENSG00000162073	PAQR4	1.40749	5.58124e-17	9.13766e-15
ENSG00000162078	ZG16B	1.41258	0.000593972	0.00586474
ENSG00000167767	KRT80	1.41598	2.74929e-12	2.27706e-10
ENSG00000167232	ZNF91	1.41665	8.16289e-10	4.10477e-08
ENSG00000183250	LINC01547	1.41754	0.000393938	0.00417354
ENSG00000165029	ABCA1	1.42802	3.43797e-07	9.45441e-06
ENSG00000256262	USP30-AS1	1.44379	1.20543e-05	0.000212155
ENSG00000101342	TLDC2	1.44557	7.12624e-05	0.000977948
ENSG00000154114	TBCEL	1.44634	4.62374e-10	2.45669e-08
ENSG00000271147	ARMCX5-GPRASP2	1.44704	0.000404929	0.00425478
ENSG00000141574	SECTM1	1.45116	1.48929e-11	1.02911e-09
ENSG00000169035	KLK7	1.45251	0.000185796	0.00220017
ENSG00000132530	XAF1	1.45672	1.56341e-10	8.91206e-09
ENSG00000183935	HTR7P1	1.45719	0.000507211	0.0051489
ENSG00000101986	ABCD1	1.45922	2.15992e-17	3.84957e-15
ENSG00000254612	RP11-676M6.1	1.46929	8.19272e-08	2.68264e-06
ENSG00000146842	TMEM209	1.47036	1.22735e-14	1.47543e-12
ENSG00000124256	ZBP1	1.47057	1.15427e-06	2.74529e-05
ENSG00000162654	GBP4	1.48521	5.88598e-12	4.45562e-10
ENSG00000092330	TINF2	1.48601	3.39023e-16	4.77344e-14
ENSG00000108468	CBX1	1.4898	1.75766e-19	3.86685e-17
ENSG00000129465	RIPK3	1.49205	2.08607e-05	0.000341136
ENSG00000124249	KCNK15	1.49451	9.03432e-05	0.00119777
ENSG00000164327	RICTOR	1.49731	3.11956e-17	5.49042e-15
ENSG00000172403	SYNPO2	1.4988	2.46838e-10	1.37916e-08
ENSG00000073605	GSDMB	1.50209	2.23363e-09	1.00478e-07
ENSG00000136542	GALNT5	1.50249	2.22989e-15	2.96197e-13
ENSG00000127585	FBXL16	1.50768	2.217e-13	2.2785e-11
ENSG00000272398	CD24	1.50865	1.33224e-11	9.33231e-10
ENSG00000137745	MMP13	1.50959	2.34221e-07	6.66228e-06
ENSG00000167680	SEMA6B	1.51235	0.00072246	0.00691519
ENSG00000111911	HINT3	1.51568	4.55446e-08	1.59519e-06
ENSG00000113532	ST8SIA4	1.51794	1.1953e-07	3.69076e-06
ENSG00000112769	LAMA4	1.51796	5.64589e-08	1.9248e-06
ENSG00000196787	HIST1H2AG	1.52056	0.000205331	0.0023933
ENSG00000197142	ACSL5	1.52088	5.40025e-11	3.39445e-09
ENSG00000169436	COL22A1	1.52683	4.11018e-08	1.45041e-06
ENSG00000197646	PDCD1LG2	1.52719	6.34233e-08	2.12271e-06
ENSG00000180573	HIST1H2AC	1.53061	7.03832e-09	2.8808e-07
ENSG00000133985	TTC9	1.53613	2.05155e-11	1.38874e-09
ENSG00000120875	DUSP4	1.53725	2.59611e-20	5.99233e-18
ENSG00000198146	ZNF770	1.54154	6.78419e-12	5.02744e-10
ENSG00000006747	SCIN	1.54629	0.000376185	0.00401568
ENSG00000078401	EDN1	1.55072	6.6728e-11	4.10275e-09
ENSG00000187510	PLEKHG7	1.55423	0.000500442	0.00509488
ENSG00000103485	QPRT	1.55506	2.18509e-05	0.000352821
ENSG00000084628	NKAIN1	1.55586	3.07938e-05	0.000480683
ENSG00000164061	BSN	1.56651	2.38071e-09	1.06077e-07
ENSG00000162645	GBP2	1.56964	5.48454e-18	1.04828e-15
ENSG00000103089	FA2H	1.56967	2.79909e-12	2.30475e-10
ENSG00000127329	PTPRB	1.57209	5.36213e-07	1.40332e-05
ENSG00000107984	DKK1	1.57333	8.42976e-14	9.20085e-12
ENSG00000102048	ASB9	1.57589	0.000334282	0.00362053
ENSG00000141622	RNF165	1.57611	7.728e-05	0.00104827
ENSG00000270168	LA16c-380H5.3	1.578	2.36726e-08	8.61268e-07
ENSG00000162241	SLC25A45	1.58623	6.51194e-05	0.000904223
ENSG00000008300	CELSR3	1.58705	7.77063e-16	1.06224e-13
ENSG00000258947	TUBB3	1.61634	0.000521297	0.00526417
ENSG00000196154	S100A4	1.62007	2.17811e-07	6.28438e-06
ENSG00000136367	ZFHX2	1.62262	4.11278e-05	0.000617339
ENSG00000198910	L1CAM	1.62685	4.10372e-17	7.13338e-15
ENSG00000166592	RRAD	1.63674	1.16054e-08	4.51392e-07
ENSG00000114698	PLSCR4	1.63706	5.53718e-08	1.89692e-06
ENSG00000144063	MALL	1.6539	1.21881e-10	7.21045e-09
ENSG00000113555	PCDH12	1.65672	0.000162971	0.00197303
ENSG00000155850	SLC26A2	1.66032	1.06236e-13	1.14183e-11
ENSG00000106541	AGR2	1.66053	7.04209e-13	6.5232e-11
ENSG00000197291	RAMP2-AS1	1.66499	0.000485961	0.00497262
ENSG00000122694	GLIPR2	1.66502	1.16039e-10	6.9822e-09
ENSG00000012779	ALOX5	1.66718	1.14756e-06	2.73394e-05
ENSG00000137672	TRPC6	1.66838	1.55173e-11	1.06578e-09
ENSG00000124507	PACSIN1	1.67187	3.8372e-06	7.9687e-05
ENSG00000151117	TMEM86A	1.67307	5.41282e-08	1.85884e-06
ENSG00000148219	ASTN2	1.67789	6.18096e-08	2.08201e-06
ENSG00000181690	PLAG1	1.685	3.45629e-07	9.46951e-06
ENSG00000125744	RTN2	1.68569	8.7277e-13	7.92813e-11
ENSG00000023839	ABCC2	1.69738	9.93838e-08	3.15163e-06
ENSG00000128833	MYO5C	1.69979	5.40635e-12	4.13704e-10
ENSG00000133321	RARRES3	1.70086	2.55e-21	6.29896e-19
ENSG00000144452	ABCA12	1.70432	3.38906e-18	6.91564e-16
ENSG00000137501	SYTL2	1.70546	8.06795e-07	2.00347e-05
ENSG00000258689	LINC01269	1.71494	0.000131652	0.00165358
ENSG00000214900	LINC01588	1.71716	2.0177e-05	0.000331496
ENSG00000197921	HES5	1.72853	9.46739e-06	0.000174477
ENSG00000142623	PADI1	1.73274	1.16207e-07	3.61191e-06
ENSG00000138623	SEMA7A	1.7335	7.24181e-07	1.8208e-05
ENSG00000156966	B3GNT7	1.73855	1.35603e-10	7.85719e-09
ENSG00000056291	NPFFR2	1.74108	1.00392e-12	9.06102e-11
ENSG00000176945	MUC20	1.74242	2.29556e-05	0.000368966
ENSG00000164073	MFSD8	1.74447	3.4647e-12	2.7876e-10
ENSG00000197191	CYSRT1	1.75416	8.13522e-05	0.00109611
ENSG00000135925	WNT10A	1.76354	1.10166e-05	0.000196903
ENSG00000101210	EEF1A2	1.7707	2.1463e-08	7.89032e-07
ENSG00000144583	MARCH4	1.77769	4.34798e-12	3.38721e-10
ENSG00000125775	SDCBP2	1.77958	1.84659e-12	1.55688e-10
ENSG00000188089	PLA2G4E	1.78251	4.86866e-09	2.06478e-07
ENSG00000136153	LMO7	1.78992	2.19439e-29	1.23588e-26
ENSG00000197822	OCLN	1.79183	6.09943e-12	4.59251e-10
ENSG00000177409	SAMD9L	1.79184	2.48515e-06	5.35849e-05
ENSG00000102032	RENBP	1.79824	2.60034e-07	7.33722e-06
ENSG00000172738	TMEM217	1.81044	0.000558162	0.00555794
ENSG00000023171	GRAMD1B	1.82127	6.42396e-10	3.30107e-08
ENSG00000179674	ARL14	1.82531	1.62529e-08	6.13516e-07
ENSG00000261104	RP11-734K21.5	1.83129	9.77602e-05	0.00128162
ENSG00000148344	PTGES	1.8367	2.56437e-30	1.71935e-27
ENSG00000102886	GDPD3	1.83951	8.42934e-13	7.70682e-11
ENSG00000111110	PPM1H	1.84215	8.50578e-05	0.00113734
ENSG00000204991	SPIRE2	1.85127	6.00667e-11	3.70938e-09
ENSG00000143412	ANXA9	1.85434	1.37912e-11	9.61286e-10
ENSG00000163739	CXCL1	1.85872	0.00022964	0.00262446
ENSG00000186472	PCLO	1.85973	3.57342e-24	1.09378e-21
ENSG00000128342	LIF	1.85996	5.6893e-15	7.08897e-13
ENSG00000169418	NPR1	1.87054	0.000156577	0.00190875
ENSG00000104951	IL4I1	1.87359	2.00332e-07	5.81583e-06
ENSG00000198959	TGM2	1.88822	2.39429e-09	1.06346e-07
ENSG00000122641	INHBA	1.90236	9.36236e-06	0.000172768
ENSG00000169245	CXCL10	1.9063	1.58603e-06	3.6311e-05
ENSG00000168243	GNG4	1.91046	1.76109e-07	5.19836e-06
ENSG00000105246	EBI3	1.91608	4.11026e-07	1.10233e-05
ENSG00000152689	RASGRP3	1.93925	4.65923e-08	1.62784e-06
ENSG00000078114	NEBL	1.94185	1.77237e-07	5.22069e-06
ENSG00000206538	VGLL3	1.94203	2.93232e-10	1.6065e-08
ENSG00000135636	DYSF	1.95215	2.73574e-22	7.26778e-20
ENSG00000172927	MYEOV	1.95381	1.64046e-13	1.7237e-11
ENSG00000159674	SPON2	1.96422	2.28482e-06	5.00315e-05
ENSG00000086548	CEACAM6	1.96548	7.04216e-05	0.000969243
ENSG00000166825	ANPEP	1.96677	3.39155e-09	1.46932e-07
ENSG00000115590	IL1R2	1.971	3.10534e-10	1.68815e-08
ENSG00000170214	ADRA1B	1.97486	7.71865e-06	0.000146073
ENSG00000163435	ELF3	1.98072	1.1267e-22	3.11057e-20
ENSG00000107485	GATA3	1.98402	9.76187e-17	1.52719e-14
ENSG00000170442	KRT86	1.99203	0.000914059	0.00841173
ENSG00000163131	CTSS	2.01606	5.44583e-14	6.18365e-12
ENSG00000203999	LINC01270	2.02264	0.000267418	0.00297884
ENSG00000101850	GPR143	2.02505	0.00100983	0.00915541
ENSG00000204539	CDSN	2.02625	2.69026e-11	1.77835e-09
ENSG00000146674	IGFBP3	2.03586	4.51932e-05	0.000668404
ENSG00000172667	ZMAT3	2.04252	1.34878e-10	7.85044e-09
ENSG00000135363	LMO2	2.05384	1.72538e-06	3.91828e-05
ENSG00000134242	PTPN22	2.06376	0.000220868	0.00254034
ENSG00000230438	SERPINB9P1	2.07197	0.000621803	0.00609889
ENSG00000198542	ITGBL1	2.07204	0.000341379	0.00368746
ENSG00000170421	KRT8	2.08565	1.31609e-16	2.01419e-14
ENSG00000250412	KLHL2P1	2.08875	0.00108555	0.0097032
ENSG00000169429	CXCL8	2.09263	0.000543801	0.00544188
ENSG00000136155	SCEL	2.09338	1.28855e-13	1.37445e-11
ENSG00000281406	BLACAT1	2.1027	1.38328e-12	1.19488e-10
ENSG00000259120	SMIM6	2.10351	0.00029585	0.00325435
ENSG00000117594	HSD11B1	2.10637	7.14036e-09	2.90567e-07
ENSG00000121380	BCL2L14	2.12952	1.23548e-14	1.47543e-12
ENSG00000162572	SCNN1D	2.13134	0.000496955	0.00506304
ENSG00000197506	SLC28A3	2.13464	7.27766e-09	2.94452e-07
ENSG00000147003	TMEM27	2.14834	6.71124e-17	1.08614e-14
ENSG00000175175	PPM1E	2.14867	1.43879e-05	0.000247957
ENSG00000227695	DNMBP-AS1	2.16352	6.18329e-10	3.22447e-08
ENSG00000189143	CLDN4	2.16528	3.30148e-26	1.29125e-23
ENSG00000128917	DLL4	2.17514	7.93631e-08	2.61082e-06
ENSG00000177694	NAALADL2	2.17515	0.000106246	0.00137875
ENSG00000102524	TNFSF13B	2.18242	6.80017e-11	4.14487e-09
ENSG00000184113	CLDN5	2.18607	5.05595e-05	0.000732384
ENSG00000151414	NEK7	2.19307	9.31472e-15	1.15045e-12
ENSG00000102962	CCL22	2.19414	4.26898e-26	1.62452e-23
ENSG00000121858	TNFSF10	2.20316	2.72808e-23	7.83906e-21
ENSG00000136383	ALPK3	2.20517	6.22285e-10	3.23287e-08
ENSG00000143507	DUSP10	2.22097	3.99143e-30	2.44345e-27
ENSG00000162366	PDZK1IP1	2.23807	4.752e-17	8.06122e-15
ENSG00000071073	MGAT4A	2.2433	3.54601e-13	3.46721e-11
ENSG00000171711	DEFB4A	2.2441	0.000379727	0.00404736
ENSG00000172478	C2orf54	2.25855	2.60796e-10	1.44567e-08
ENSG00000020181	ADGRA2	2.26878	1.56338e-08	5.91729e-07
ENSG00000100985	MMP9	2.27981	9.80391e-05	0.00128408
ENSG00000100583	SAMD15	2.29186	2.67145e-05	0.000422295
ENSG00000049249	TNFRSF9	2.31512	0.000563214	0.00559637
ENSG00000171631	P2RY6	2.3252	1.53048e-10	8.7598e-09
ENSG00000110944	IL23A	2.3357	0.000335738	0.00363351
ENSG00000151882	CCL28	2.33887	6.98718e-17	1.11795e-14
ENSG00000272079	LA16c-380H5.5	2.34041	2.85088e-13	2.84683e-11
ENSG00000129048	ACKR4	2.34121	0.000255378	0.00286283
ENSG00000167755	KLK6	2.35209	4.1523e-09	1.77703e-07
ENSG00000204385	SLC44A4	2.35654	2.92925e-10	1.6065e-08
ENSG00000204542	C6orf15	2.36532	4.46506e-09	1.89934e-07
ENSG00000149596	JPH2	2.36758	5.52509e-30	3.24138e-27
ENSG00000117115	PADI2	2.37919	2.46143e-43	4.33212e-40
ENSG00000185215	TNFAIP2	2.38277	1.839e-08	6.83195e-07
ENSG00000163216	SPRR2D	2.39296	1.05974e-08	4.14477e-07
ENSG00000163283	ALPP	2.39625	3.08935e-05	0.000481706
ENSG00000176920	FUT2	2.39757	1.52569e-15	2.04588e-13
ENSG00000179546	HTR1D	2.4093	1.20597e-12	1.05467e-10
ENSG00000241794	SPRR2A	2.42933	2.08817e-09	9.45383e-08
ENSG00000171951	SCG2	2.43202	1.68544e-05	0.000282523
ENSG00000150551	LYPD1	2.44708	1.0501e-05	0.000189222
ENSG00000135094	SDS	2.44797	5.19163e-08	1.79162e-06
ENSG00000276980	CTD-3128G10.7	2.4652	1.21135e-07	3.72397e-06
ENSG00000105499	PLA2G4C	2.47558	5.18284e-09	2.17834e-07
ENSG00000165140	FBP1	2.48074	9.14678e-10	4.53474e-08
ENSG00000171401	KRT13	2.49304	3.22764e-13	3.20037e-11
ENSG00000080573	COL5A3	2.49429	1.52601e-09	7.1383e-08
ENSG00000121769	FABP3	2.51421	9.8319e-06	0.000178854
ENSG00000008056	SYN1	2.53675	5.13266e-12	3.94906e-10
ENSG00000188505	NCCRP1	2.53877	2.04792e-32	1.80217e-29
ENSG00000156218	ADAMTSL3	2.57272	1.35643e-09	6.43049e-08
ENSG00000198835	GJC2	2.57435	2.51776e-12	2.09764e-10
ENSG00000177614	PGBD5	2.57594	2.88739e-11	1.89091e-09
ENSG00000179044	EXOC3L1	2.58522	1.38471e-16	2.09643e-14
ENSG00000080031	PTPRH	2.58826	1.88139e-14	2.20749e-12
ENSG00000169067	ACTBL2	2.60144	0.000103259	0.00134619
ENSG00000203785	SPRR2E	2.60255	1.82547e-08	6.79965e-07
ENSG00000244094	SPRR2F	2.60737	1.02579e-06	2.4859e-05
ENSG00000102452	NALCN	2.62255	7.77609e-10	3.92428e-08
ENSG00000226125	LINC01907	2.62682	3.68251e-12	2.94601e-10
ENSG00000127954	STEAP4	2.63734	4.06736e-12	3.21733e-10
ENSG00000105289	TJP3	2.65698	4.98648e-16	6.95144e-14
ENSG00000163993	S100P	2.66428	1.65033e-27	8.01261e-25
ENSG00000167653	PSCA	2.66643	9.63675e-11	5.82341e-09
ENSG00000157064	NMNAT2	2.68048	1.08062e-06	2.60533e-05
ENSG00000218416	PP14571	2.685	0.000208569	0.002417
ENSG00000197635	DPP4	2.68607	6.18209e-27	2.80786e-24
ENSG00000188760	TMEM198	2.70156	1.02377e-27	5.14809e-25
ENSG00000140323	DISP2	2.70705	2.49553e-39	3.5137e-36
ENSG00000153233	PTPRR	2.71185	2.29051e-18	4.81349e-16
ENSG00000265107	GJA5	2.7138	1.18039e-07	3.65271e-06
ENSG00000261040	WFDC21P	2.72589	8.06808e-18	1.50968e-15
ENSG00000174059	CD34	2.7322	2.02817e-05	0.00033244
ENSG00000204323	SMIM5	2.73578	3.25652e-07	8.99055e-06
ENSG00000181143	MUC16	2.75385	1.7644e-24	5.91493e-22
ENSG00000183018	SPNS2	2.76922	3.08302e-26	1.24025e-23
ENSG00000013588	GPRC5A	2.79909	6.47268e-48	1.51892e-44
ENSG00000133169	BEX1	2.80028	6.78815e-11	4.14487e-09
ENSG00000232810	TNF	2.8245	0.000194103	0.00228128
ENSG00000168306	ACOX2	2.8385	7.74552e-06	0.000146189
ENSG00000183307	CECR6	2.83924	3.22111e-09	1.39979e-07
ENSG00000169962	TAS1R3	2.87092	0.000251617	0.00282743
ENSG00000147168	IL2RG	2.88837	5.88781e-11	3.66816e-09
ENSG00000253824	KB-173C10.2	2.97281	4.54774e-06	9.24417e-05
ENSG00000172159	FRMD3	3.00366	0.000102396	0.00133618
ENSG00000188293	IGFL1	3.02367	7.30723e-10	3.70093e-08
ENSG00000125531	FNDC11	3.07708	3.88607e-06	8.04646e-05
ENSG00000116039	ATP6V1B1	3.08536	2.36677e-05	0.000379546
ENSG00000168631	DPCR1	3.08637	1.17138e-10	7.01832e-09
ENSG00000142973	CYP4B1	3.12743	0.000471614	0.00484696
ENSG00000128383	APOBEC3A	3.13039	4.71441e-06	9.53719e-05
ENSG00000128268	MGAT3	3.13138	3.06326e-06	6.47609e-05
ENSG00000131203	IDO1	3.15005	4.89231e-17	8.20044e-15
ENSG00000170523	KRT83	3.15863	3.91426e-06	8.0864e-05
ENSG00000281162	LINC01127	3.16978	5.54262e-06	0.000109945
ENSG00000008735	MAPK8IP2	3.19502	1.48368e-49	4.17804e-46
ENSG00000015413	DPEP1	3.21185	6.71619e-06	0.000129895
ENSG00000093134	VNN3	3.22367	0.000134298	0.00167932
ENSG00000227507	LTB	3.25187	6.76016e-10	3.44866e-08
ENSG00000122862	SRGN	3.25972	1.08544e-07	3.41138e-06
ENSG00000138347	MYPN	3.27986	6.22608e-19	1.32823e-16
ENSG00000112299	VNN1	3.30684	5.97293e-06	0.000117621
ENSG00000112303	VNN2	3.31045	4.51357e-05	0.000668256
ENSG00000187534	PRR13P5	3.31279	0.00102411	0.0092551
ENSG00000023445	BIRC3	3.33235	2.03034e-17	3.66503e-15
ENSG00000101265	RASSF2	3.40854	1.452e-05	0.000249929
ENSG00000166920	C15orf48	3.42523	2.98721e-18	6.18529e-16
ENSG00000119547	ONECUT2	3.43091	9.67083e-09	3.82477e-07
ENSG00000108309	RUNDC3A	3.48526	3.40001e-36	4.35201e-33
ENSG00000100298	APOBEC3H	3.53436	2.36768e-06	5.13666e-05
ENSG00000143469	SYT14	3.53497	1.04048e-20	2.48303e-18
ENSG00000205426	KRT81	3.63604	1.5071e-21	3.85819e-19
ENSG00000132622	HSPA12B	3.64725	1.05094e-05	0.000189222
ENSG00000213937	CLDN9	3.68113	1.46886e-24	5.04427e-22
ENSG00000167183	PRR15L	3.72853	3.14773e-30	2.01455e-27
ENSG00000102003	SYP	3.75506	6.04407e-32	5.00591e-29
ENSG00000104327	CALB1	3.7609	8.17889e-29	4.42918e-26
ENSG00000166257	SCN3B	3.78039	9.10027e-07	2.23616e-05
ENSG00000089199	CHGB	3.78629	1.24259e-35	1.45797e-32
ENSG00000128564	VGF	3.80734	2.10393e-59	7.40582e-56
ENSG00000145113	MUC4	3.82035	1.71852e-10	9.75678e-09
ENSG00000197457	STMN3	3.85643	5.6744e-89	3.99478e-85
ENSG00000179331	RAB39A	3.90597	1.99699e-10	1.12922e-08
ENSG00000142224	IL19	3.959	3.59465e-15	4.64336e-13
ENSG00000173702	MUC13	3.97805	6.0542e-23	1.70486e-20
ENSG00000188060	RAB42	4.02451	1.36132e-15	1.84301e-13
ENSG00000185499	MUC1	4.05117	1.0232e-73	4.8022e-70
ENSG00000126262	FFAR2	4.06376	2.25206e-07	6.43186e-06
ENSG00000115155	OTOF	4.06548	1.23651e-14	1.47543e-12
ENSG00000125966	MMP24	4.15518	2.30161e-34	2.31476e-31
ENSG00000094755	GABRP	4.25825	2.27993e-10	1.27894e-08
ENSG00000176907	C8orf4	4.35047	3.51572e-07	9.60575e-06
ENSG00000131914	LIN28A	4.43019	1.24741e-09	5.97399e-08
ENSG00000103056	SMPD3	4.43293	9.22927e-12	6.56304e-10
ENSG00000158786	PLA2G2F	4.43819	3.17758e-09	1.38515e-07
ENSG00000184012	TMPRSS2	4.57277	8.44558e-07	2.08255e-05
ENSG00000155265	GOLGA7B	4.60952	1.22346e-22	3.31275e-20
ENSG00000213943	KRT18P17	5.02259	0.000332487	0.00360387
ENSG00000268104	SLC6A14	5.73466	1.84667e-24	6.04676e-22
ENSG00000130477	UNC13A	6.01539	2.29023e-30	1.61232e-27
ENSG00000160716	CHRNB2	6.12422	5.84292e-45	1.17526e-41
ENSG00000104112	SCG3	6.99566	4.04536e-34	3.79725e-31
